# Supplementary material for: The health inequity and socioeconomic inequality faced by adolescent girls and women on the move living with or at high risk of HIV infection, during the COVID-19 pandemic in Nigeria
Source: HighWire-hosted journal article supplement (doi:10.1136/bmjgh-2023-012116), 2023-12-01
Supplement: bmjgh-2023-012116supp001_data_supplement.pdf [file bmjgh-2023-012116supp001_data_supplement.pdf]

## Protocol

### Multivariate impacts of the COVID-19 crisis on women and girls living with or at high risk of HIV (W&GLHIV) in Nigeria: a rapid national and sub-national cross-sectional survey

#### Project background/rationale

The COVID-19 crisis causes profound consequences worldwide. The efforts to curb the spread of the virus are driving societies and economies in a turmoil. There will be aggravated impacts of COVID-19 crisis for women, increasingly so for those living on the economic margins. The pandemic is deepening pre-existing inequalities and discriminations, exposing vulnerabilities in social, political, and economic systems which are in turn amplifying the impacts of the pandemic. Although we have learned a remarkable amount about COVID-19 in a short time, its potential impact on women and girls living with HIV (W&GLHIV) in settings with high HIV burdens is becoming a major concern, increasingly so in dual colliding HIV and COVID epidemic settings. *We sought to assess* (i) multivariate impacts of the COVID-19 crisis on W&GLHIV in Nigeria provincially and nationally, and (ii) the role and resilience of the community response in addressing HIV and public health gaps in mitigating the impact of the COVID-19 crisis.

#### Objectives of the project

**The study will address the following objectives:**

- To determine the impacts of the COVID-19 crisis in terms of increased inequalities and socioeconomic vulnerabilities among W&GLHIV in Nigeria.
- To determine the sociodemographic, economic, and clinical factors associated with the reduced access to health services, including HIV prevention and treatment services, sexual and reproductive health (SRH), family planning (FP), TB prevention and treatment services among W&GLHIV during the COVID-19 crisis in Nigeria.
- To provide gender-specific considerations related to vaccination for SARS-CoV2 among W&GLHIV, including W&GLHIV in key and vulnerable populations in Nigeria.
- To provide insights to gender-specific strategies and policies designed to reduce the impacts of the pandemic on W&GLHIV in Nigeria.

**The purpose of the project** is to learn about the implications of COVID-19 crisis for W&GLHIV, including for those in key and vulnerable populations (KVPs), in settings with high HIV burdens, to get insights on how to rebuild and reshape the HIV response once the wave of COVID-19 is passed and nations learn to live with the dual pandemic of HIV and COVID-19.

#### Duration of project

On countersignature of the contract until 30 September 2021.

#### Site(s) of proposed Project

Nigeria is Africa's largest economy and most populous country, with more than 200 million inhabitants. The country suffers from high rate of poverty and income inequality, with 50% of the population living in extreme poverty and 70% do not have access to safe drinking water. In addition, 69% of urban residents living in slum conditions and 23% of labor force is unemployed. The country is divided in 37 states grouped in 6 geopolitical zones. States vary immensely in religion, culture and language, human development, and income.

Nigeria is also a home to one of the largest HIV epidemics in the world, with estimated 1.8 million HIV cases cumulatively, and estimated 45 thousand deaths due to AIDS. In Nigeria, women bear a

disproportionate burden of the disease, with estimated 940 thousand HIV cases. The HIV epidemic is feminized with a gender ratio of 1.3:1. Nigeria is otherwise the fifth most hit African country by COVID-19. From the start of the pandemic, there have been about 160 thousand cases of COVID-19 diagnosed in Nigeria, and about 2 thousand deaths due to COVID-19.

There are six geopolitical zones in Nigeria. The team intends to recruit participants in each of the geopolitical zones to estimate multivariate impacts of the COVID-19 crisis on W&GLHIV in Nigeria. The rationale for the selection of the geopolitical zones is that they represent a diverse segment of the Nigerian population. The states will be decided in consultation with the national community leaders.

#### Major beneficiaries

The study aims to recruit an estimated minimum sample size of 2,160 participants. This sample size is required to provide an adequate variability and diversity in the survey questions. Whilst this is not a probability-based sampling, the sample of participants (N=2,160) also satisfies the sample size statistical criteria with a 95% confidence level and 5% margin of error.

The target population is W&GLHIV aged 15-64 years old, as well as W&GLHIV in KVPs, including those living with disabilities, involved in transactional sex, sex workers or female sex workers (FSW), migrants, refugees, W&GLHIV who use and/or inject drugs, and W&GLHIV of the LGBT+ community.

The inclusion criteria for the study participants include the following:

- Must identify as W&GLHIV, including W&GLHIV in KVPs (e.g., transgender woman living with HIV, etc.)
- Must be aged 15 years and older.
- Must give informed consent.
- Must not have already participated in this same survey.

#### Implementing agency

The Institute of Public Health (IPH), Obafemi Awolowo University, Ile-Ife, Nigeria was established in 1994 to serve as a centre for generating ideas about health development, health promotion, and disease prevention programs, in line with national health policy and priorities. Inaugurated as a research, training, and service organ of the College of Health Sciences, Obafemi Awolowo University, IPH is the only university-based Institute of Public Health in any Nigerian university today and is a part of the College of Health Sciences at the OAU, Ile-Ife. The Institute has conducted numerous large-scale multi-state household surveys within Nigeria and has a large network of enumerators and other experts.

#### Responsible officer(s)

The Principal Investigator (PI) of the study in Nigeria is Dr Morenike Oluwatoyin Ukpong, Professor at the Institute of Public Health of the Obafemi Awolowo University, Ile-Ife (Nigeria).

#### Scope of work

**Ethics review:** The Principal Investigator in Nigeria will request the ethics clearance from the Institutional Review Board (IRB) of Obafemi Awolowo University, Ile-Ife.

**Implementation:** Upon ethics review, as a first part of the study, consenting participants will be asked or will be assisted to fill out a confidential anonymous web-based questionnaire (**Questionnaire #1**). As a second part of the study, the prominent formal and informal community-based organisations, which provide services and/or assistance to W&GLHIV, and W&GLHIV in KVPs, in the six geopolitical zones in Nigeria will be identified and offered to complete a web-based questionnaire designed to assess the known impacts of the COVID-19 crisis on W&GLHIV, and the role of the community response (**Questionnaire #2**). The second questionnaire is aimed at the community organizations, including CSOs, CBOs, NGOs, formal and informal, working with any of the target population subgroups. The most prominent community organizations will be identified in all provinces and at the national level and invited to take the survey. Questionnaires will be filled via phone/tablet/computer-assisted self-interviewing (CASI). In the case where the participant has literacy issues, the interviewer will offer computer-assisted personal interviewing (CAPI).

**Promotion and data collection:** An outreach strategy will be employed to rollout and promote the survey among the target subpopulations. Key CBOs will be identified and invited as partners to rollout and promote the survey among the W&GLHIV. Data collectors will come from participating CBOs and may include representatives from the community of W&GLHIV, including W&GLHIV from KVPs. This will allow meaningful inclusion and capacity development. Training of data collectors will be conducted ahead of any data collection activities. Data collectors will be linked to the identified community leads to start the dialogue and plan the targeted community outreach and data collection activities. The overall study manager will supervise data collectors for the duration of the project. The assigned study manager will coordinate data collection efforts, organize logistical support to the data collectors, identify and engage representatives of the CSOs, CBOs, NGOs, and other formal/informal networks, which are involved in providing support to the study's target subpopulations. In addition, the research team will ensure that the sample has national and sub-national representation, socio-economic diversity, and will adjust the work of the data collectors/interviewers accordingly to ensure representation across target subpopulations.

**Survey content:** The first questionnaire (**Questionnaire #1**) is designed as a population based individual survey, which comprises approximately 65 questions, combining validated instruments with specific questions related to COVID-19 crisis. **Among others, it includes modules on the impact of the COVID-19 crisis, such as:**

- Sociodemographic questions, e.g., residence, age, education, etc.
- Health care access and its change due to COVID-19 crisis: COVID-19, HIV, tuberculosis (TB), FP, SRH.
- Happiness, wellbeing, and mental health, and change of the above due to COVID-19 crisis.
- Any change due to COVID-19 crisis in the following areas: sexual and gender-based violence (SGBV), intimate partner violence (IPV), unwanted pregnancies, deliveries of babies at home.
- Any change due to COVID-19 crisis in the following areas: economic vulnerability, poverty, change in income, job, change in socioeconomic status.
- Any change due to COVID-19 crisis in the following areas: behavioural economics variables such as time preference, risk aversion, altruism.
- Any change due to COVID-19 crisis in the following areas: access to social protection measures, COVID-19 special programmes.
- 'Logic' questions related to the impact of COVID-19 measures and change of attitude faced by each population cluster such as living with disabilities, being migrant or refugee, engaging in sex work or transactional sex.

The second questionnaire (**Questionnaire #2**) is intended to additionally survey identified prominent non-governmental organizations (NGOs), civil society organizations (CSO), community-based organizations (CBO), and other formal and informal networks engaged in supporting the target group,

W&GLHIV, including W&GLHIV in key and vulnerable populations. This part of the study is aimed to assess the known impacts of the COVID-19 crisis on W&GLHIV, and the role of the community response. It will reflect the experiences, and contributions of the community stepping in to ensure access to HIV and other essential health care during the COVID-19 crisis. The questionnaire will likewise assess resilience, the change in their capacity to reach out to their members, as well as to support those disproportionately affected by the COVID-19 crisis, and the challenges they face in the aftermath of the COVID-19 epidemic.

**The Questionnaire #2 will cover among others the following topics:**

- The role in addressing public health gaps and health care disruptions.
- Integrating prevention efforts and services to respond to GBV.
- Expanding the capacity of shelters for victims of violence, designating domestic violence and GBV shelters.
- Expanding access to sufficient and affordable water, sanitation, and hygiene services for vulnerable groups of W&GLHIV (including in informal settlements, rural areas, and refugee camps).
- Expanding the reach and benefit levels of social assistance programmes, work-sharing, childcare services.
- Expanding feeding programmes.
- Introducing new cash transfers, vouchers, social pensions, expanding access to paid family leave and paid sick leave.
- Sustaining and expanding access to HIV, SRH, FP, TB, and other essential healthcare programmes.
- Building a gender-inclusive socio-economic response and recovery for impacted W&GLHIV, including from the KVPs.
- Stepping up advocacy and awareness campaigns.
- Change in funding for the community response.

**Data Analysis:** Data cleaning and statistical analysis will be performed in Q2-Q3 2021 to describe and interpret the findings of the survey. A report on the results and findings is intended to be published in Q3 2021 following data collection and statistical analysis.

[Security and data privacy](#)

The study does not collect any personal information and records are unidentifiable. The questions, taken all together, do not reveal any information that could make respondents vulnerable to harm or to risk of exploitation. The questionnaire does not use or collect geolocation data, it does not install any tracker cookies on the device of the respondents.

Participants access the questionnaire through an SSL end-to-end encrypted, secured link. Responses are anonymous and no personal identifier is collected. Each member of the survey team will sign a declaration of confidentiality and privacy.

Individual responses are stored on the server of the survey tool (stored in Europe, GDPR compliant). Security backups are regularly done (UNAIDS/SID) and securely stored on an encrypted cloud (pCloud, with encrypted cloud located in Europe)

[Project outputs](#)

The list of the project outputs is provided below.

| Research activity / Output | Institution |
|----------------------------|-------------|
|----------------------------|-------------|

|                                                                              |                                                                         |
|------------------------------------------------------------------------------|-------------------------------------------------------------------------|
| Research protocol developed                                                  | INSTITUTE OF PUBLIC HEALTH, OBAFEMI AWOLowo UNIVERSITY, ILE IFE, UNAIDS |
| Ethics committee approval                                                    | INSTITUTE OF PUBLIC HEALTH, OBAFEMI AWOLowo UNIVERSITY, ILE IFE, UNAIDS |
| Identification of main partners CBOs, CSOs, peer networks                    | INSTITUTE OF PUBLIC HEALTH, OBAFEMI AWOLowo UNIVERSITY, ILE IFE         |
| Survey instruments developed                                                 | INSTITUTE OF PUBLIC HEALTH, OBAFEMI AWOLowo UNIVERSITY, ILE IFE, UNAIDS |
| Training and contracting implementation partner                              | INSTITUTE OF PUBLIC HEALTH, OBAFEMI AWOLowo UNIVERSITY, ILE IFE         |
| Data collection and pilot                                                    | INSTITUTE OF PUBLIC HEALTH, OBAFEMI AWOLowo UNIVERSITY, ILE IFE         |
| Recruitment of hard-to-reach participants or locations without networks/CBOs | INSTITUTE OF PUBLIC HEALTH, OBAFEMI AWOLowo UNIVERSITY, ILE IFE         |
| Data cleaning and encoding                                                   | INSTITUTE OF PUBLIC HEALTH, OBAFEMI AWOLowo UNIVERSITY, ILE IFE, UNAIDS |
| First brief on the results                                                   | INSTITUTE OF PUBLIC HEALTH, OBAFEMI AWOLowo UNIVERSITY, ILE IFE, UNAIDS |
| Data sets, analysis                                                          | INSTITUTE OF PUBLIC HEALTH, OBAFEMI AWOLowo UNIVERSITY, ILE IFE, UNAIDS |
| Dissemination of the findings for policy change                              | INSTITUTE OF PUBLIC HEALTH, OBAFEMI AWOLowo UNIVERSITY, ILE IFE, UNAIDS |
| Report up to 70 pages with supplementary materials                           | INSTITUTE OF PUBLIC HEALTH, OBAFEMI AWOLowo UNIVERSITY, ILE IFE, UNAIDS |

#### Planned use of outputs

The project outputs, including data, analysis, the report on the findings, and policy direction and change, are intended for policy makers, government, community, development partners, the UN agencies including at the local, regional, and global levels. The findings will also be of interest for the researchers.

#### Capacity building

The project outputs, including data, analysis, the report on the findings, and policy direction and change will contribute to the new knowledge for the HIV response. These primary data collection efforts in a rapid assessment will provide necessary insight for any policy shift and advocacy necessary for the HIV response in high HIV prevalence settings, where the two epidemics HIV and COVID-19, are colliding.

[Involvement of UNAIDS envisaged](#)

UNAIDS SID focal points will support the Institute of Public Health of the Obafemi Awolowo university, Ile Ife in the development of the survey design and the outputs as described in the table above, including development of the research protocol, data collection tools. UNAIDS will advise and provide on oversight to data collection, will support data analysis, and development of the report of the findings.

[Workplan of proposed activities](#)

| Research Activity /Output                                                                   | Institution                                                             | Tentative timelines, a subject to change |      |     |      |
|---------------------------------------------------------------------------------------------|-------------------------------------------------------------------------|------------------------------------------|------|-----|------|
|                                                                                             |                                                                         | Start                                    |      | End |      |
|                                                                                             |                                                                         | Q                                        | Year | Q   | Year |
| Protocol developed                                                                          | INSTITUTE OF PUBLIC HEALTH, OBAFEMI AWOLOWO UNIVERSITY, ILE IFE, UNAIDS | Q2                                       | 2021 | Q2  | 2021 |
| Ethics committee approval                                                                   | INSTITUTE OF PUBLIC HEALTH, OBAFEMI AWOLOWO UNIVERSITY, ILE IFE, UNAIDS | Q2                                       | 2021 | Q2  | 2021 |
| Identification of main partners CBOs, CSOs, peer networks                                   | INSTITUTE OF PUBLIC HEALTH, OBAFEMI AWOLOWO UNIVERSITY, ILE IFE         | Q2                                       | 2021 | Q2  | 2021 |
| Survey instruments developed                                                                | INSTITUTE OF PUBLIC HEALTH, OBAFEMI AWOLOWO UNIVERSITY, ILE IFE, UNAIDS | Q2                                       | 2021 | Q2  | 2021 |
| Training and contracting implementation partners                                            | INSTITUTE OF PUBLIC HEALTH, OBAFEMI AWOLOWO UNIVERSITY, ILE IFE         | Q2                                       | 2021 | Q3  | 2021 |
| Pilot survey and final adjustment                                                           | INSTITUTE OF PUBLIC HEALTH, OBAFEMI AWOLOWO UNIVERSITY, ILE IFE         | Q2                                       | 2021 | Q2  | 2021 |
| Data collection through recruitment of hard-to-reach subpopulations in 6 geopolitical zones | INSTITUTE OF PUBLIC HEALTH, OBAFEMI AWOLOWO UNIVERSITY, ILE IFE         | Q2                                       | 2021 | Q2  | 2021 |
| Data cleaning and encoding                                                                  | INSTITUTE OF PUBLIC HEALTH, OBAFEMI AWOLOWO UNIVERSITY, ILE IFE, UNAIDS | Q2                                       | 2021 | Q3  | 2021 |
| First brief on the results                                                                  | INSTITUTE OF PUBLIC HEALTH, OBAFEMI AWOLOWO UNIVERSITY, ILE IFE, UNAIDS | Q2                                       | 2021 | Q2  | 2021 |

|                                                        |                                                                               |    |      |    |      |
|--------------------------------------------------------|-------------------------------------------------------------------------------|----|------|----|------|
| Data analysis                                          | INSTITUTE OF PUBLIC HEALTH,<br>OBAFEMI AWOLOWO<br>UNIVERSITY, ILE IFE, UNAIDS | Q2 | 2021 | Q3 | 2021 |
| Disseminate findings for<br>clinical and policy change | INSTITUTE OF PUBLIC HEALTH,<br>OBAFEMI AWOLOWO<br>UNIVERSITY, ILE IFE, UNAIDS | Q2 | 2021 | Q3 | 2021 |
| Report                                                 | INSTITUTE OF PUBLIC HEALTH,<br>OBAFEMI AWOLOWO<br>UNIVERSITY, ILE IFE, UNAIDS | Q3 | 2021 | Q3 | 2021 |

### Monitoring

UNAIDS will hold weekly online meetings, and correspondence necessary during all stages of the project implementation, including appraisal for the design phase, finalization of the research proposal, and data collection tools, as well as later will conduct monitoring for the implementation phase, including study roll-out, data collection, training, recruitment of the participants, monitoring of the response rates, and will furthermore perform any necessary adjustments to fulfil the project objectives, and outputs.

UNAIDS will oversee the project implemented by the Institute of Public Health, Obafemi Awolowo University, Ile Ife with particular attention regarding the following activities:

- Develop an operational plan for the project, including detailed activities and timelines, frequency and schedule of data collection, responsibilities for the project implementation.
- Once the operational plan is elaborated, a monitoring plan will be prepared. It will address the expected results level, i.e., when, whether or to what extent expected results are being achieved.
- Improve the implementation of the project and ensure the optimum use of funds.
- Review the workplans and budgets.
- Recommend adjustments and corrective action, if necessary.
- Foster accountability and transparency in the management process.
- Ensure that the technical cooperation is pertinent, effective, and efficient.
- Provide well substantiated information on project progress and results.
- Develop data analysis and dissemination plan.
- Learn lessons of experience with the aim of improving the design, formulation, and management of project.

### Evaluation

Evaluation will be performed during the project implementation to examine whether the study is successfully recruiting and retaining its intended participants from the defined target groups, using training materials and following the research protocol and ethics, that meet standards for accuracy and clarity, maintaining its projected timelines, coordinating efficiently. Evaluation during the project implementation will be used to inform mid-course corrections to study implementation (formative evaluation) and to shed light on implementation processes (process evaluation). Following completion of the project, evaluation will examine its outcomes, summarize its overall performance, including, its efficiency and sustainability.

Evaluators: Erik Lamontagne, Anna Yakusik (UNAIDS SID).

### Sustainability / replicability

With all eyes are on health, health systems and health care, with countries wanting to be better equipped to deal not only with COVID-19 but also to create healthier, more resilient societies, this project intends to build the new insights on the multivariate impacts of the COVID-19 crisis on women and girls living with HIV in Nigeria. The context of two colliding epidemics, experiences of individuals and communities collected in a consistent manner will reveal the knowledge necessary to shape the future HIV response and potentially have an impact on the community health. This opportunity can be seized by learning from HIV and from COVID-19 to make important changes to develop rights-based, equitable, people-centred systems for health. The project findings can be expanded within the African region and potentially adapted in low- and middle-income settings and similar epidemiological contexts.



## Questionnaire

### Survey on the impact of COVID-19 on HIV services, wellbeing, and economic vulnerability of women and girls living with or at risk for HIV

Dear Participant,

Thank you for participating in this survey which will help improve actions taken in response to the COVID-19 pandemic and inform the response to similar future outbreaks. The purpose of this survey is to understand and explore the various impacts of the COVID-19 crisis on the health and wellbeing of women and girls living with or at risk for HIV in Nigeria, as well as related economic shocks as a driver of heightened vulnerability of women and girls.

This study will involve completing a 20-minute survey that will ask you questions relating to the coronavirus.

Participation is open to woman and girls aged at least 15-year-old, living in Nigeria and is voluntary. This survey is anonymous. Please be reassured, that all responses are confidential. You can skip question you are not comfortable with. You can also stop participating to the survey at any moment by closing the page.

This study is conducted by the Institute of Public Health, Obafemi Awolowo University, in collaboration with UNAIDS. It has been approved by the Ethics Review Committee of the Institute of Public health, Obafemi Awolowo University, Ile-Ife, Osun State, Nigeria (approval number: IPHOAU/12/1692).

By taking part, you are agreeing that you have read and understood the information about the study provided below. Please click on "show policy" below for more details about the study, and contact details of the research group.

There are 145 questions in this survey.

#### Socio-demographic background

Please tell us a bit about you and your background.

All your answers are confidential and nobody can identify you. It is anonymous.

1 Data Collector's Identification \_\_\_\_\_

## 2 In which geopolitical zone do you currently live?\*

Please choose **only one** of the following:

- North Central
- North East North
- West South East
- South South
- South West

## 3 How old are you?\* \*

Please choose **only one** of the following:

- 
- Under 15
- 15-18
- 19-24
- 25-30
- 31-34
- 35-39
- 40-44
- 45-49
- 50-54
- 55-59

4 Can you confirm your ethnicity?

Please choose **only one** of the following:

- Birom
- Bura
- Edo
- Efik
- Fulani
- Gwari
- Hausa
- Ibibio
- Idoma
- Igala
- Igbo
- Ijaw
- Ikwere
- Itsekiri
- Kaje
- Kanuri
- Okrika
- Nupe
- Shuwa-Arab
- Urhobo
- Tiv
- Yoruba
- I cannot or do not wish to answer this
- I don't know
- Other

## 5 What is your religion?

Please choose **only one** of the following:

- 
- 
- 
- Catholic
- Hinduism
- Islam
- Judaism
- Protestant
- Traditional
- None

## 6 Do you identify having a disability (do you have a physical or mental condition that limits your movements, senses, or daily activities)?

Please choose **only one** of the following:

- 
- 
- Yes
- No

I cannot or do not wish to answer this question

## 7 Do you have difficulty in the following domains?

Please choose the appropriate response for each item:

|                                                   | No difficulty         | Some difficulty       | A lot of difficulty   | Cannot function at all |
|---------------------------------------------------|-----------------------|-----------------------|-----------------------|------------------------|
| Seeing even if wearing glasses                    | <input type="radio"/> | <input type="radio"/> | <input type="radio"/> | <input type="radio"/>  |
| Hearing even if using a hearing aid               | <input type="radio"/> | <input type="radio"/> | <input type="radio"/> | <input type="radio"/>  |
| Walking or climbing steps                         | <input type="radio"/> | <input type="radio"/> | <input type="radio"/> | <input type="radio"/>  |
| Remembering or concentrating                      | <input type="radio"/> | <input type="radio"/> | <input type="radio"/> | <input type="radio"/>  |
| Speech (like using your usual language)           | <input type="radio"/> | <input type="radio"/> | <input type="radio"/> | <input type="radio"/>  |
| Personal care (like washing all over or dressing) | <input type="radio"/> | <input type="radio"/> | <input type="radio"/> | <input type="radio"/>  |

## 8 What is your highest level of schooling completed?

Please choose **only one** of the following:

- 
- 
- No formal education
- Quranic only Primary
- school
- High school or secondary school
- Trade school, vocational training, or apprenticeship

Postsecondary education or some college University

## 9 What type of dwelling or house do you live in?

Please choose **only one** of the following:

- 
- 
- 
- A house or a flat
- A traditional house like a mud hut An
- informal house like a shack
- A refugee camp / temporary shelter A
- women's shelter
- Rehabilitation centre

## 10 In your household, is there:

Please choose **all** that apply:

- 
- 
- Electricity
- A mobile phone
- A television
- A gas or electric stove A
- refrigerator
- 
- A computer
- Internet at home A
- bicycle
- A motorcycle A

## 11 What is the main source of drinking water for members of your household?

Please choose **only one** of the following:

Piped water into dwelling

Piped water into yard

Piped to neighbour Public

tap / standpipe Tube well

or borehole Dug well,

unprotected

Dug well, protected (wellhead is protected by a plastered cement slab) Water

from spring

Rainwater

Tanker truck

Cart with small tank

Surface water (river, dam, lake, canal, ...) Bottled

## 12 What kind of toilet facility do members of your household usually use?

Please choose **only one** of the following:

Flush toilet

Pit latrine with slab

Pit latrine without slab / open pit

13 Does any members of this household own any agricultural land?

Please choose **only one** of the following:

Yes

14 Which of the following describes the place where you now live?

Please choose **only one** of the following:

A large city A

town

A village

15 In this city, you live in:

Please choose **only one** of the following:

A wealthy suburb

A middle-class suburb A

poor suburb

A slum

A refugee camp / temporary shelter



16 Indicate total number of people living with you in your household?

Please choose **only one** of the following:

1 (only me)

2

3

4

5

6

7

8

9

10

11

12

13

13

## 16 Indicate total number of people living with you in your

### 17 With whom do you currently live?

Please choose **all** that apply:

Alone, no other person

Spouse

A sexual or romantic partner (non-spouse) Other

adult family members

Close friend(s) or roommate(s)

Children under the age of 18

Children above the age of 18 Any

## 18 What is your current relationship status?

Please choose **all** that apply:

Single

Married

In a relationship but not living together In

more than one relationship Divorced /

separated

Widowed

## 19 How many children do you have?

Please choose **only one** of the following:

0

1

2

3

4

5

6

7

8

## 20 Do you have young children (under 18y)?

Please choose **all** that apply:

Yes, living with me

Yes, but not living with me No,

my children are above 18 I don't

know

## 21 Who do you have sex with?

Please choose **only one** of the following:

Men only

Women only

Both men and women

Other (example: asexual, pansexual, ...) I

have never had sex

## 20 Do you have young children (under 18y)?

Please choose **all** that apply:

## 22 How would you primarily define your gender identity?

Please choose **only one** of the following:

- 
- Woman
- Transgender woman (male to female) Transgender
- man (female to male)
- I don't know
- I cannot or do not wish to answer this question

## 23 What sex were you assigned at birth?

Please choose **only one** of the following:

Female

Male

Intersex - my sex was unclear at birth and/or I was diagnosed with an intersex condition

### The COVID-19 epidemic

This section contains questions on the health and non-health impacts of the COVID-19 pandemic on you.

## 24 In general, how would you rate your health?

Please choose **only one** of the following:

Excellent

Very good

Good

Fair

## 25 Do you use public transport?

Please choose **only one** of the following:

Yes, more than before the COVID-19 crisis Yes,

same as before the COVID-19 crisis Yes, less than

before the COVID-19 crisis Not anymore since

COVID-19 crisis

26 Have you or anyone in your household been screened  
or tested for COVID-19 ?

Please choose **only one** of the following:

Yes

No

27 Have you or anyone in your household ever had a positive  
COVID-19 test result?

Please choose **only one** of the following:

Yes

No

28 What precautions do you take to avoid becoming infected  
or reinfected with COVID-19?

Please choose **all** that apply:

No particular measure

Wash or sanitize my hands frequently

Wearing a re-usable cloth or disposable face mask Avoid

crowded areas

Avoid going out

Daily monitoring of signs and symptoms

Going to a health facility or testing site for a COVID-19 test if I have signs or symptoms

## 29 What challenge do you face in taking measures to prevent COVID-19 infection?

Please choose **all** that apply:

There is no place to wash my hands around where I live I

cannot afford to pay for cloth or disposable face masks I

cannot afford to buy soap or sanitizers

I cannot avoid crowded areas I

already had COVID-19

I don't really care about COVID-19

## 30 Are you worried that you or someone in your immediate family may become seriously ill from COVID-19?

Please choose **only one** of the following:

Very worried

Somewhat worried

Not too worried Not



### 31 What makes you confident that you or your relative will not become seriously ill from COVID-19?

Please choose **all** that apply:

I follow preventive measures (handwashing, physical distancing, masks, etc.) We are strong and healthy

Weather is hot here

God will protect us

It is curable/treatable. There

is a cure for COVID-19.

### 32 When a vaccine for COVID-19 is available to me, I will get it

Please choose **only one** of the following:

Strongly agree

Agree Disagree

Strongly disagree

### 33 What are the reasons you are not sure you want a vaccine for COVID-19?

Please choose **all** that apply:

- 
- 
- I think the risk to me of getting COVID-19 is low I'm
- against vaccines in general
- 
- It is not a priority for me
- I am afraid of side effects
- My family or the person I live with (husband, partner, etc) is against it
- Registering for it could put me in trouble due to my situation (example I'm an illegal worker, migrant, etc)
- I think it is against my religion
- I do not trust what the authorities say
- I do not have time to go to a health centre for a vaccine

### 34 Did you have to stop school/ university/ college due to the COVID-19 pandemic?

Please choose **only one** of the following:

- 
- 
- Yes
- No

### 35 What made you stop school during COVID-19

#### pandemic?

Please choose **all** that apply:

- 
- 
- The school/ university/ college was closed due to the COVID-19 My
- parents or my family did not allow this
- 
- Nobody to look after my child/children
- Money problems
- Stigma
- I had no data /internet to attend online classes I

become pregnant

### 36 Are you planning to return to school after the pandemic?

Please choose **only one** of the following:

- 
- Yes, I have already returned to school Yes,
- later
- No

I don't know

#### Your economic and social situation

This page includes questions on work, income, benefits, and how COVID-19 crisis affected your situation.

37 How many people contribute financially to your household (you included)?

Please choose **only one** of the following:

- 0
- 1 (only me)
- 2
- 3
- 4
- 5
- 6
- 7
- 8

38

In the last 30 days, did you do any work, do any kind of business, farming, or other activity in exchange of a salary, cash or in kind, even if only for few hours?

Please choose **only one** of the following:

Yes

### 39 Are you paid in cash or in-kind for this work or are you not paid at all?

Please choose **only one** of the following:

- Cash only Cash  
 and kind In kind  
 only Not paid

### 40 What is the main reason you are not currently working?

Please choose **only one** of the following:

- Business or office closed due to Covid legal restrictions Business or  
 office closed for another reason  
 I was retrenched or lost my job  
 I have been temporarily told not to work I  
 am ill or quarantined  
 I need to care for the children while schools are closed I  
 need to care for an ill relative  
 Not able to work or farm due to lack of inputs It  
 is not the farming season  
 I'm a student  
 I'm pregnant or on maternity

**41** Currently, what are your main sources of income? (maximum 3)Please choose **all** that apply: I have paid work I am self-employed/ have my own business (example: hairdresser or sex worker) I am a daily wage earner (example: domestic workers) Petty trade From agriculture I am in survival mode (example: recycling and selling in slums, begging) Money sent by family members (inside or outside of Nigeria) Assistance from the Government (social grants or the COVID-19 grant) Assistance from NGOs / charitable organisation Pension for me or a family member

I am engaging in transactional sex or I have a sugar daddy I do

not have any source of income

**42** Did your total income change since COVID-19 started?Please choose **only one** of the following:

Increased No

change

### 43 How much has your income been reduced due to the COVID-19 crisis?

Please choose **only one** of the following:

- 
- 
- No change in my income
- reduced by less than half my income
- reduced by about half my income
- reduced by more than half my income

### 44 How are you coping with this reduction in your income?

Please choose **all that apply**:

- 
- 
- Relied on savings
- Reduced food consumption
- Reduced non-food consumption
- Did nothing
- Transactional sex or Sex work Received
- assistance
- Help from family Sale of assets

45 Do you access special COVID-19 relief grant or other COVID-19 support measures (example: social grants or food vouchers)

Please choose **only one** of the following:

- 
- 
- Yes I applied, and I received these support measures
- Yes I applied, and I am waiting for the support measure
- I can access these support measures if I want, but I don't I
- have been denied access
- These measures are not applicable to me

46 Since the COVID-19 crisis began, do you eat less or skip meals because there was not enough money for food?

Please choose **only one** of the following:

- 
- Yes

47 Do you have enough money today to cover the daily expenses of today and tomorrow?

Please choose **only one** of the following:

- 
- Yes



48 Do you have a bank account in your name?

Please choose **only one** of the following:

Yes

49

Do you currently participate in a Esusu, Adashe, Ajo or other cooperative?

Please choose **only one** of the following:

Yes

50 In the past 6 months, did you not pay or underpay your rent or bond?

Please choose **only one** of the following:

Yes

No

I cannot or do not wish to answer this question

51 Since the COVID-19 crisis began, did you move in with other people, even for little while, because of financial problems?

Please choose **only one** of the following:

Yes

No

I cannot or do not wish to answer this question

52 How many times did you have to move since COVID-19 crisis began?

Please choose **only one** of the following:

0

1

2

3

4

5

more than 5

53

Think of a ladder representing where people stand in your country.

At the top of the ladder are the people who are the best off. At the bottom are the people who are the worst off.

Where would you place yourself on this ladder at this moment?

Please choose **only one** of the following:

- 10, among those having most money, most education and most respected jobs
- 9
- 8
- 7
- 6
- 5
- 4
- 3
- 2
- 1, among those having the least money, least education and least respected jobs or no job

54

Now, think of a ladder representing where people stand in your local community.

Where would you place yourself on this ladder at this moment?

Please choose **only one** of the following:

- 10, highest standing in my community
- 9
- 8
- 7
- 6
- 5
- 4
- 3
- 2
- 1

### Behavioural economics

This section is on how you make your choices and your decisions, how you decide courses of action.

## 55 How willing are you to take risks, in general?

Please choose **only one** of the following: 10,

- very willing
- 9
- 8
- 7
- 6
- 5
- 4
- 3
- 2
- 1

## 56 How willing are you to take risks, in general?

### 56 How willing are you to give to good causes without expecting anything in return?

Please choose **only one** of the following:

10, very willing to do so 9

8

7

6

5

4

3

2

1

57

Imagine the following situation: Today you unexpectedly received 20,000 Naira. How much of this amount would you donate to a good cause?

Please write your answer here:

58 How willing are you to give up something that is beneficial for you today in order to benefit more from that in the future?

Please choose **only one** of the following:

10, very willing to do so

9

8

7

6

5

4

3

2

1

0, very unwilling to do so

59 How well does the following statement describe you as

a person: “I only act to satisfy immediate concerns, figuring that I will take care of future problems that may occur at a later date”

Please choose **only one** of the following:

- 5, it describes me perfectly 4,  
 it somewhat describes me 3,  
 uncertain  
 2, it somewhat does not describe me 1, it

60 How well does the following statement describe you as a person: “I assume that people have only the best intentions”

Please choose **only one** of the following:

- 10, describes me perfectly 9  
 8  
 7  
 6  
 5  
 4  
 3  
 2  
 1  
 0, does not describe me at all



## 59 How well does the following statement describe you as Your health and wellbeing

This section contains questions on health and non-health impacts of the COVID-19 pandemic.

Remember, your answers are confidential and you may skip a question if you are not

comfortable with it.

61 Imagine a ladder with steps representing happiness in life, with the 10th step being the happiest. On which step of the ladder do you stand at this time?

Please choose **only one** of the following:

10, the best possible life for me 9

 8 7 6 5 4 3 2 1

## 62 Over the past 2 weeks, how often have you been bothered by the following problems?

Please choose the appropriate response for each item:

|                                             | Nearly every day (12-14 days) | More than half the days (8-11 days) | Several days (1-7 days) | Not at all (0 day)    |
|---------------------------------------------|-------------------------------|-------------------------------------|-------------------------|-----------------------|
| Feeling down, depressed or hopeless         | <input type="radio"/>         | <input type="radio"/>               | <input type="radio"/>   | <input type="radio"/> |
| Little interest or pleasure in doing things | <input type="radio"/>         | <input type="radio"/>               | <input type="radio"/>   | <input type="radio"/> |
| Feeling nervous, anxious or on edge         | <input type="radio"/>         | <input type="radio"/>               | <input type="radio"/>   | <input type="radio"/> |
| Not being able to stop or control worrying  | <input type="radio"/>         | <input type="radio"/>               | <input type="radio"/>   | <input type="radio"/> |

## 63 In the past 6 months, how often have you thought about taking your own life?

Please choose **only one** of the following:



Never

Seldom Very

often All the

64

If you're thinking about suicide, be sure to talk to other people about it. They can be friends or family members, but they don't have to be. It can be difficult to talk about this topic with people close to you. What is important is that you talk to someone.

You can do this by phone, chat, e-mail or in person Nigeria Suicide Hotline:

+234 (0) 806 210 6493

+234 (0) 809 210 6493

65 Which of the following healthcare services did you access in the last year?

Please choose **all** that apply:

Public Healthcare (clinic, hospital)

Private Healthcare (clinic, hospital, pharmacy)

Traditional healer

None, I don't want to use any healthcare services I cannot afford any healthcare

66

Did COVID-19 pandemic have an impact on your attendance at the health facilities for the following services when you needed them?

Please choose the appropriate response for each item:

|                                                                            | Yes                   | No                    | Not needed            |
|----------------------------------------------------------------------------|-----------------------|-----------------------|-----------------------|
| <b>HIV services</b>                                                        | <input type="radio"/> | <input type="radio"/> | <input type="radio"/> |
| <b>Tuberculosis services</b>                                               | <input type="radio"/> | <input type="radio"/> | <input type="radio"/> |
| <b>Family planning</b>                                                     | <input type="radio"/> | <input type="radio"/> | <input type="radio"/> |
| <b>Safe abortion care</b>                                                  | <input type="radio"/> | <input type="radio"/> | <input type="radio"/> |
| <b>Sexually transmitted infection (STI)</b>                                | <input type="radio"/> | <input type="radio"/> | <input type="radio"/> |
| <b>Services for gender-based violence or intimate partner violence</b>     | <input type="radio"/> | <input type="radio"/> | <input type="radio"/> |
| <b>Gender-affirming hormone therapy</b>                                    | <input type="radio"/> | <input type="radio"/> | <input type="radio"/> |
| <b>Other chronic care (diabetes, hypertension, cardiovascular disease)</b> | <input type="radio"/> | <input type="radio"/> | <input type="radio"/> |

67 Are there costs which are preventing you from accessing the HIV or health services you needed above?

Please choose **all** that apply:

Transportation cost

The cost of medicines or tests Fees

at the clinic or hospital

The additional nonofficial fees (example baksheesh)

The income I would miss out on while going to access these health services

I have no money or all the money I have is being used for food and essential items I prefer

not to answer

## 67 Are there costs which are preventing you from

## 68 Are there other reasons that prevent you from accessing family planning, or the HIV services you needed above?

Please choose **all** that apply:

The road to the health facility is risky for me (e.g. violence, high risk of sexual assault)

I'm worried people could discover my sexual orientation I'm

worried people could discover my HIV status

Last time I went for HIV or health service I was humiliated

Last time I went for HIV or health service I faced improper treatment (violence, insult, or discrimination)

I do not have time to go to the health facility

The service was offered at school or at a local NGO and it is now closed due to COVID-

I am not ready to deal with my HIV infection

I fear being infected with COVID-19 in the health facility I

prefer not to answer

69 Did you become pregnant during the COVID-19

pandemic?

Please choose **only one** of the following:

Yes

No

70 Was this pregnancy planned?

Please choose **only one** of the following:

Yes

No

No, I was raped I

don't know



**71**

If you are a survivor of rape, we encourage you to report the incident to the nearest police station and health facility.

Please do not hesitate to reach out for assistance. Take a screenshot of these numbers:

Hotline: 08052004698 and 08180091072

Helpline for child abuse: 08085753932 or 08102678442

Website: <http://www.projectalertnig.org> (<http://www.projectalertnig.org/>)

Facebook page: <http://www.facebook.com>

[/ProjectAlertOnViolenceAgainstWomen](https://www.facebook.com/ProjectAlertOnViolenceAgainstWomen) ([https://www.facebook.com](https://www.facebook.com/ProjectAlertOnViolenceAgainstWomen/)

[/ProjectAlertOnViolenceAgainstWomen/](https://www.facebook.com/ProjectAlertOnViolenceAgainstWomen/))

**72 Have you attended antenatal care during this pregnancy?**

Please choose **only one** of the following:

Yes

No

I don't know

I cannot or do not wish to answer

**73 Where did/do you plan on delivering your baby?**

Please choose **only one** of the following:

Health facility

Home with assistance of community health worker

Home, non-assisted

## 74 When was your last HIV test? \*

Please choose **only one** of the following: In

- the last 3 months
- 4 to 6 months ago
- 7 to 12 months ago
- More than 12 months ago I
- never had an HIV test

## 75 Do you know your HIV status?\* \*

Please choose **only one** of the following:

- 
- I am HIV-positive I
- am HIV-negative I
- don't know

## 76 Are you currently taking HIV (antiretroviral) treatment?

Please choose **only one** of the following:

- 
- Yes

## 77 Is there a reason you are not taking HIV antiretroviral therapy?

Please choose **all** that apply:

I used to, but stopped since COVID-19 crisis started Medication

is currently not available at the clinic or hospital I am unable to

collect medications at the clinic or hospital

I cannot tolerate medication side effects or am worried about taking the pills I do

not feel treatment is needed

I am worried someone would find out my HIV status I

am not ready to deal with my HIV infection

I am worried the healthcare workers would treat me badly or disclose my HIV status without my consent

## 78 Since COVID-19 crisis started, did you have an HIV viral load or CD4 test?

Please choose **only one** of the following:

Yes

No

## 79 What are the reasons you could not have an HIV viral load of CD4 test in the last 12 months?

Please choose **only one** of the following:

- 
- It was planned and cancelled because of COVID-19 I
- cannot afford the costs of the test
- I did not follow up with my lab test
- I was not aware I should do regular HIV viral load test every year

### Gender-based violence

Since COVID-19 crisis started, many girls and women have been facing increased violence. This violence can be physical or sexual, but it can also be emotional and financial.

This section poses sensitive questions. You may skip any question you are not comfortable answering.

## 80 Do you feel that you are currently experiencing:

Please choose **only one** of the following:

- 
- More violence than before the COVID-19 crisis
- The same level of violence as before the COVID-19 crisis Less
- violence than before the COVID-19 crisis
- I am not experiencing any violence

## 81 From whom are you experiencing violence?

Please choose **all** that apply: Family

- Romantic / Sexual partner Friends
- Neighbours Healthcare
- providers Police
- and/or military
- Employer or co-workers
- Religious or faith community
- Teachers or school Government
- representatives Reporters and
- the media Other
- 

## 82 Since COVID-19 crisis began, how often did your partner, husband or parent try to keep you from going to work or school?

Please choose **only one** of the following:

- 
- 
- Very often
- Often
- Sometimes
- Rarely Never

83 Since the COVID-19 crisis began, how often did

your partner, husband or parent withhold money, make you ask for money, or take your money?

Please choose **only one** of the following:

Very often

Often

Sometimes

Rarely Never

84 Since COVID-19 crisis began, how often did your partner, husband or parent try to keep you from seeing friends and family?

Please choose **only one** of the following:

Very often

Often

Sometimes

Rarely Never

83 Since the COVID-19 crisis began, how often did

85 Since COVID-19 crisis began, how often did your partner, husband or parent try to insult and criticize you?

Please choose **only one** of the following:

Very often

Often

Sometimes

Rarely Never

86 Since the COVID-19 crisis began, has your partner/s or husband slapped, punched, kicked, or shoved you?

Please choose **only one** of the following:

Yes

No

87 If yes, did this happen...

Please choose **only one** of the following:

Before the COVID-19 crisis

Since the COVID-19 crisis started

88 How often did this happen since the COVID-19 crisis began?

Please choose **only one** of the following:

Once

2 to 5 times

6 to 10 times

10 or more times

I cannot or do not wish to answer this question



89 Since COVID-19 crisis began, has your partner or husband physically forced you to have sexual intercourse or do something sexual when you did not want to?

Please choose **only one** of the following:

Yes

No

90 If yes, did this happen...

Please choose **only one** of the following:

Before the COVID-19 crisis

Since the COVID-19 crisis started

91 How often did this happen since the COVID-19 crisis began?

Please choose **only one** of the following:

Once

2 to 5 times

6 to 10 times

10 or more times

I cannot or do not wish to answer this question

92 Since COVID-19 crisis began, has someone who is **not** your regular partner forced or pressured you into sexual activity?

Please choose **only one** of the following:

Yes

No

I cannot or do not wish to answer this question

93 If yes, did this happen...

Please choose **only one** of the following:

Before the COVID-19 crisis

Since the COVID-19 crisis started

94 How often did this happen since the COVID-19 crisis began?

Please choose **only one** of the following:

Once

2 to 5 times

6 to 10 times

10 or more times

I cannot or do not wish to answer this question

## 95 If yes, who forced or pressured you to have sex in past 6 months?

Please choose **all** that apply:

A non-relative who lives with you

Uniformed officer (police, military, security officer)

Trusted individual (teacher, classmate, friend, co-worker, neighbour, religious leader) Stranger

Sex work client

Family member (parent, sibling, relative)

Other

I cannot or do not wish to answer

## 96 Did you report these instances of violence?

Please choose **only one** of the following:

Yes

## 97 What prevented you from reporting these instances of violence?

Please choose **all** that apply:

I could not report the case due to lockdown/ my movements were restricted I

don't know how to report this

I was afraid of reporting the case

The police will do nothing/ there will be no justice I

was embarrassed

98

Nothing justifies any form of violence to you, never!

Please note or take a screenshot of the numbers and links below:

Hotlines: 08052004698 or 08180091072

Website: <http://www.projectalertnig.org>  
(<http://www.projectalertnig.org/>)

Facebook page: <http://www.facebook.com/ProjectAlertOnViolenceAgainstWomen>  
(<https://www.facebook.com/ProjectAlertOnViolenceAgainstWomen/>)

### Citizenship

This section contains 4 questions on citizenship and migrancy status. We assure you that this information is confidential. It is NOT shared with any authority.

99

What is your nationality?

Please choose **only one** of the following:

Nigeria

Other African country Other

100

Please be reassured, all your answers are confidential and anonymous. They will NOT be shared with any authority, never.

Would you say you are:

Please choose **only one** of the following:

I am a migrant I

am a refugee

I am seeking asylum

I cannot or do not wish to answer I

101 Are you a returning migrant or have you been displaced from your home place?

Please choose **only one** of the following:

No, I am not a returning migrant or a displaced person

Yes, I am a returning migrant (I migrated to another country and came back here) Yes, I

have been forced to move from my home place

I don't know

## 102 Why did you leave?

Please choose **all** that apply:

Economic reasons (example: job, salary) Family

considerations

Drought

Tribal conflicts Forced

relocation Insecurity

Violation of human rights

Armed conflicts

## 103 Do you have citizenship, or a valid residence permit (e.g. a work permit) for Nigeria?

Please choose **only one** of the following:

Yes

No

Unsure

### Transactional Sex and Sex Work

This section contains questions about non-marital sexual relationships in exchange for money, material support or other benefit.

Please be reassured again, your answers are confidential and will NOT be told to anyone. You can skip any question you are not comfortable with.

104 In the past 12 months, did you enter into a sexual relationship with a man (NOT your husband) mainly in order to get things that you need, money, gifts, school fees, clothes, or other things that are important to you?

Please choose **only one** of the following:

- 
- Yes, before the COVID-19 crisis but not now Yes,
- before the COVID-19 crisis and currently Yes, since
- the COVID-19 crisis but not before No, I have
- never

105 The last time you had sexual intercourse with this person from previous question, was a condom used?

Please choose **only one** of the following:

- 
- Yes

104 In the past 12 months, did you enter into a sexual

106

Have you ever engaged in sex work (being paid to have sex)?

Please choose **only one** of the following:

Yes, before the COVID-19 crisis but not now Yes,  
 before the COVID-19 crisis and currently Yes, since

the COVID-19 crisis but not before No, I have

never

I am unsure



107

Has the COVID-19 crisis influenced your engagement in sex work?

Please choose **all** that apply:

I engage in more sex work I

engage in sex work online

I earn less money per customer

I take more risks or do things beyond my comfort I

108 What is the main reason for engaging in more condomless sex?

Please choose **all** that apply:

Condom stockout

Afraid to go to the pharmacy

Lockdown and curfews make it harder to buy condoms No

money to buy condoms

Harder to negotiate condom use with clients

109 Has the COVID-19 crisis created additional police crackdowns on sex work where you live?

Please choose **only one** of the following:

Yes

No

### Alcohol and Substance Use

This section is about alcohol and substance or drug use, as well as the impact of COVID-19 on its consumption.

110 How has your alcohol use changed since the COVID-19 crisis began?

Please choose **only one** of the following:

I started drinking during COVID-19 crisis (I was not drinking before) Increased

No change

Decreased

Does not apply to me, I don't drink

This includes ogogoro, palm wine (tombo, pammy...), burukutu, nito and other local alcoholic

111

How often have you had a drink containing alcohol since the COVID-19 crisis began, (that is since March 2020)?

Please choose **only one** of the following:

Never

Monthly or less

2 to 4 times a month

2 to 3 times per week

4 or more times per week

112

How many drinks did you have on a typical day when you are drinking?

Please choose **only one** of the following:

1 or 2

3 or 4

5 or 6

7 to 9

10 or more

113 How often have you had six or more drinks on one occasion?

Please choose **only one** of the following:

Never

Less than monthly

Monthly

Weekly

Daily or almost daily

114 Since COVID-19 crisis began, have you used tobacco products?

Please choose **only one** of the following:

Yes

No

I don't know

I cannot or do not wish to answer

### 113 How often have you had six or more drinks on one

### 115 How has your tobacco use changed since the COVID-19 crisis began?

Please choose **only one** of the following:

I started smoking during Covid-19 crisis (I was not smoking before) Increased

No change

Decreased

## 116 Since the COVID-19 crisis began, have you used any substance or drug?

Please choose **only one** of the following:

Yes

No

I don't know

I cannot or do not wish to answer

## 117 How are you using these substance or drugs?

Please choose **only one** of the following:

I inject them (with syringe and needles)

I don't inject them, meaning I smoke, snort or swallow them I

use both ways, meaning injecting and non-injecting them I

## 118 About the injecting drugs, how often do you inject these drugs?

Please choose **only one** of the following:

Everyday Once

weekly

Two or more times a week Once

## 119 How has your use of injectable drugs changed since the COVID-19 crisis began?

Please choose **only one** of the following:

- 
- I started injecting drug during Covid-19 crisis (I was not injecting drug before) Increased
- No change
- Decreased

## 120 Does the COVID-19 crisis limit your access to the following?

Please choose the appropriate response for each item:

|                                                    | Yes                   | No                    | I don't use           |
|----------------------------------------------------|-----------------------|-----------------------|-----------------------|
| <b>Access to the drug or substance you inject?</b> | <input type="radio"/> | <input type="radio"/> | <input type="radio"/> |
| <b>Safe injection equipment (needle exchange)</b>  | <input type="radio"/> | <input type="radio"/> | <input type="radio"/> |
| <b>Opioid harm reduction (opiate substitution)</b> | <input type="radio"/> | <input type="radio"/> | <input type="radio"/> |

121 Did you share your injecting equipment (example sharing needles)?

Please choose **only one** of the following:

Yes

No

122 How has COVID-19 crisis changed your sharing of injecting equipment?

Please choose **only one** of the following:

I started sharing my injecting equipment during COVID-19 (I was not sharing it before)

Increased No

change

Decreased



## 121 Did you share your injecting equipment (example

## 123 Now about the substances or drugs you swallow, snort or smoke (NOT injecting), how often do you use these drugs?

Please choose **only one** of the following:

- 
- Everyday Once
- weekly
- Two or more times a week Once
- a month or less

## 124 How has your non-injecting drug use changed since the COVID-19 crisis began?

Please choose **only one** of the following:

I started using drug during Covid-19 crisis (I was not using drug before) Increased

No change

Decreased

### HIV Stigma

If you live with HIV, you may face stigma. Let's talk about it

Choose how you feel about each statement. We understand some questions might sound disturbing. Please share your experience. It will help to create a more inclusive environment for everyone.

## 125 Some people avoid touching me once they know I have HIV

Please choose **only one** of the following:

Strongly agree

Agree Disagree

Strongly disagree I

don't know

## 126 People I care about stopped contacting me after learning I have HIV

Please choose **only one** of the following:

- 
- 
- Strongly agree
- Agree Disagree
- Strongly disagree I

don't know

## 127 I have lost friends by telling them I have HIV

Please choose **only one** of the following:

- 
- 
- Strongly agree
- Agree Disagree
- Strongly disagree I

don't know

## 128 Telling someone I have HIV is risky

Please choose **only one** of the following:

- 
- 
- Strongly agree
- Agree Disagree
- Strongly disagree I

don't know

### 129 I work hard to keep my HIV a secret

Please choose **only one** of the following:

- Strongly agree
- Agree
- Disagree
- Strongly disagree
- I don't know

### 130

#### I am very careful whom I tell that I have HIV

Please choose **only one** of the following:

- 
- 
- Strongly agree
- Agree Disagree
- Strongly disagree I

### 131 People with HIV are treated like outcasts

Please choose **only one** of the following:

- 
- 
- Strongly agree
- Agree Disagree
- Strongly disagree I
- don't know

### 132 Most people believe a person who has HIV is dirty

Please choose **only one** of the following:

- Strongly agree
- Agree
- Disagree
- Strongly disagree
- I don't know

### 133 Most people are uncomfortable around someone with HIV

Please choose **only one** of the following:

- 
- Strongly agree
- Agree Disagree
- Strongly disagree I
- don't know

### 134 I feel guilty because I have HIV

Please choose **only one** of the following:

- 
- 
- Strongly agree
- Agree Disagree
- Strongly disagree I
- don't know

## 135 People's attitudes about HIV make me feel worse

### about myself

Please choose **only one** of the following:

- 
- Strongly agree
- Agree Disagree
- Strongly disagree I

## 136 I feel I'm not as good a person as others because I have HIV

Please choose **only one** of the following:

- 
- Strongly agree
- Agree Disagree
- Strongly disagree I
- don't know

## 135 People's attitudes about HIV make me feel worse

137 In the last 6 months, have you ever been excluded from social gatherings or activities (e.g., weddings, funerals, parties, clubs) because of your HIV status?

Please choose **only one** of the following:

Yes, once

Yes, several times

No

## 138 Living with HIV can open new horizons and positively

affects us deep inside. Which of the following have been positively affected by your HIV status

Please choose **all** that apply:

my self-confidence

my self-respect

my ability to respect others

my ability to cope with stress

my ability to better take care of my health

my ability to contribute to my community

## Transgender people

This module is about your needs as a transgender person and how the COVID-19 crisis affected your access to services you need

139 In the past 3 months, has the COVID-19 situation limited your ability to access medications and hormones specific to your trans healthcare?

Please choose **only one** of the following:

Yes

No

I don't use this resource I



140 In the past 3 months, has the COVID-19 situation

limited your ability to access to non-medical supplies? (example: make-up, shaving supplies, wigs, breast forms, etc.)

Please choose **only one** of the following:

Yes

No

I don't use this resource I

don't know

141 In the past 3 months, has the COVID-19 situation limited your ability to access to therapy or counselling services for transgender-specific support? (including peer support groups)

Please choose **only one** of the following:

Yes

No

I don't use this resource I

don't know

142 In the past 3 months, has the COVID-19 situation limited your ability to access gender-affirmation or transition-related surgery?

Please choose **only one** of the following:

Yes

No

I don't use this resource I

143

If yes, how was your surgery or surgeries impacted?

Please choose **only one** of the following:

Cancelled without rescheduling and/or delayed indefinitely

Rescheduled and completed

Rescheduled for the future with the same provider

End

144

Thank you for completing our survey!

Would you like to give us permission to recontact you on this telephone number in the future for more information or to find out if you would be willing to participate in another survey?

Please choose **only one** of the following:

Yes

145 Please be reassured, your contact will be permanently and irremediably disconnected from your answers

Thank you for your participation!

Submit your survey.

Thank you for completing this survey.
