# Supplementary material for: The health inequity and socioeconomic inequality faced by adolescent girls and women on the move living with or at high risk of HIV infection, during the COVID-19 pandemic in Nigeria
Source: HighWire-hosted journal article supplement (doi:10.1136/bmjgh-2023-012116), 2023-12-01
Supplement: bmjgh-2023-012116supp002_data_supplement.pdf [file bmjgh-2023-012116supp002_data_supplement.pdf]

## Supplementary material

### S1: Recruitment methods of the survey

Data were collected from a cross-sectional survey conducted in collaboration with community-based organisations in Nigeria between June and October 2021 during the second and third waves of COVID-19 in Nigeria. The survey covered the six geopolitical zones with participants from Adamawa, Akwa Ibom, Anambra, Benue, Enugu Gombe Kaduna, Lagos State, Nassarawa and Niger State. Participants living with or at risk of HIV were recruited voluntarily using a combination of venue-based and snowball sampling.

The survey captured different macrosocial categories of HIV vulnerability, such as women living with disability, those who engaged in sex work, who used psychoactive substances, who engaged in transactional sex, or who were on the move. More details of the study methodology have been reported in prior studies(1-3).

#### *Participants*

The sample size for the primary study was set at 60 valid respondents per target study population group in each of the six states. The study took into consideration the realities on the ground at the time of the survey, such as the resurgence of the COVID-19 pandemic due to the Delta variant, the containment measures such as transport limitation and the possibility of missing responses in the absence of guidance, support and motivation for survey response. The proposed sample size for people on the move was increased by 10% to 1188 (4). From the statistical modelling perspective, we tried to have a minimum of 10 participants with complete responses per each of the ten dependent variables for the study, enabling us to perform regression analyses with a minimum probability level of 0.05.(5)

The final sample for this study consists of 3,442 participants, including 700 women and girls on the move. We define people on the move as migrants, refugees, asylum-seekers, returning migrants and internally displaced people based on acknowledged definitions(6-8).

#### *Sampling and recruitment process*

The Jami Al Hakeem Foundation, a community-based organisation working with migrants and refugees in Nigeria, identified the community entry leads for migrants and refugees. The leadership of the community-based organisation reviewed and suggested revisions to the study protocol, made the decisions on the States for the data collection, conducted community entry programs and supported the participants' recruitment process using the venue-based sampling technique.

Trained field workers collected the participants' informed consent and provided them with a web link to the survey questionnaire. The personal electronic device used by respondents for the survey could only be used once, thereby limiting multiple survey responses by a respondent. The questionnaires were filled out independently by participants using a phone or tablet. When participants had literacy challenges, the interviewer offered computer-assisted personal interviewing. Interested study participants who came to the study venues without electronic devices could access the survey questionnaire using the field worker's electronic device.

Physical distancing was observed at the data collection venues. During the data collection, respondents were provided with a face mask and hand sanitiser. Respondents who participated in the study were given airtime vouchers for data/internet usage valued at \$1.70 (N1000).

### *Study instrument*

The questionnaire for the survey contained validated instruments for collecting survey data among women and key populations. The questionnaire went through three steps of internal and external validation: it was first reviewed and revised by a multidisciplinary team of scientists, with particular attention given to the elaboration of questions, the selection of validated instruments and their relevance to the survey's objectives. The revised questionnaire was then reviewed by 18 field workers and 36 community representatives. We pretested the final version of the questionnaire with 18 community members. Finally, we harmonised the questionnaire's content with standard indicators and protocol checklists used in behavioural surveillance.

The data were collected using a web-based survey platform, LimeSurvey™. Data were stored encrypted on the European server, compliant with EU Regulation 2016/679 on the General Data Protection Regulation. The survey was made available in English. Keywords in the questionnaires were translated into Yoruba, Igbo and Hausa and to specific dialects or local languages that were predominant in the States identified for the study. Translation into local dialects and keywords/phrases was done in consultation with community leaders participating in the project. A similar approach was successfully implemented in the 2005 and 2007 National HIV/AIDS and Reproductive Health Survey, as well as the 2008 and 2010 Integrated Biological and Behavioural Surveillance Surveys conducted in Nigeria.

### *Dependent measure*

We considered women and girls living with HIV in Nigeria. We created a dichotomic variable for people on the move that included migrants, refugees, asylum-seekers, internally displaced people (IDPs), and returning migrants.

The self-reported HIV status corresponds to the participant's answer to the question "Do you know your HIV status?" The response options were 'I am HIV-positive', 'I am HIV-negative', 'I do not know my HIV status' and 'I cannot or do not want to answer this question'. Considering that people do not test for the same reason they do not disclose their HIV status(9-11), the "I don't know" and "I do not want to answer this question" were combined into a single response.

We focused our analysis on the participants living with HIV and explored how selected dimensions of inequalities affect differently the HIV-positive adolescent girls and women who are on the move.

### *Independent measures*

We included two sociodemographic covariates: Age was categorised into three age groups: adolescent girls and young women (15-24 years), adults (25-44 years) and older adults ( $\geq 45$  years). The educational achievement was categorised into three groups: primary, secondary, and post-secondary.

The different variables and measures were selected following three broad steps: We started from the research question and the literature review to identify the potential measures and corresponding variables that could proxy the situation or the behaviours associated with the research question. We searched PubMed and Google Scholar, combining terms such as migrants, IDP, refugees, asylum-seekers, Nigeria, Africa, combined with the following terms: survey, questionnaire, instruments, mental health, PHQ-4, gender-based violence, HIV, stigma, discrimination, homophobia, sex work, transactional sex, alcohol, inequality, economic status, COVID-19, disability, health, and other terms specific to the survey.

Following this step, we assembled a long list of measures that we tested for their association with being a woman on the move living with HIV (the dependent variable). We then checked for collinearity and endogeneity before ending with a short list of relevant variables. Finally, we limited the number

of measures to what was strictly necessary, applying the principle of parsimony(12, 13) to not overfit the model and provide a better experience for the readers.

#### *Health inequity:*

*Access to HIV services:* Respondents were asked if the COVID-19 pandemic impacted their attendance at the health facilities for HIV prevention, treatment, and care-related services, hereby referred to as HIV services. Respondents had the option of ticking 'yes', 'no' or 'not needed'. The responses were dichotomised into 'yes' and 'no/not needed'. A 'yes' answer was coded as impacted access to services. The question was adapted from the questionnaire developed by the United Nations(14).

*Access to sexual and reproductive health services* was a composite score derived from indications of access to at least one of the following services: abortion, family planning, sexually transmitted infection treatment, and gender-based violence services. Respondents were asked if the COVID-19 pandemic impacted their attendance at health facilities for any sexual and reproductive health services when needed. Respondents had the option of ticking 'yes', 'no' or 'not needed'. An indication of the inability to access any of these services indicated the respondent's inability to access a sexual and reproductive health service. The responses were dichotomised into 'yes' and 'no/not needed'. A 'yes' response indicated disrupted access to services. The questions were adapted from the United Nations Population Fund questionnaire(14).

*Mental health:* This was measured using the Patient Health Questionnaire-4 (PHQ-4), a 4-item Likert-type scale instrument to screen for depression and anxiety(15). The tool had been validated for brief screening of self-reported depression and anxiety and was used for assessing psychological distress during the COVID-19 pandemic in Nigeria(16). For each patient, the mental health score is the sum of the four measures, a continuous variable (0 to 48, mean 4.70, SD 3.52). For this study, the Cronbach alpha was 0.88.

*HIV stigma score:* We used the validated 12-item short version of the Berger HIV stigma score(17, 18) used in other surveys (19). The twelve 4-point Likert questions cover four dimensions: personalised stigma, disclosure concerns, concerns about public attitudes, and negative self-image. The HIV stigma score is the sum of the twelve questions, treated as a continuous variable (4 to 48, mean 32.53, SD 8.11). For this study, the Cronbach alpha was 0.92.

#### *Socioeconomic inequality*

*Subjective social standing* was assessed using the McArthur scale(20) with the following question: "Now, think of a ladder representing where people stand in your local community. Where would you place yourself on this ladder at this moment?" Possible answers were a 10-item Likert scale ranging from "1: lowest standing in my community" to "10: highest standing in my community". The participants' responses were grouped per tercile.

*Economic precarity* was proxied with the current main source of income. Possible answers were: I have paid work; I am self-employed/ have my own business (example: hairdresser or sex worker); I am a daily wage earner (example: domestic workers); Petty trade; From agriculture; Assistance from the Government (social grants or the COVID-19 grant); Pension for me or a family member; I do not have any source of income; Assistance from NGOs or charitable organisations; I am engaging in transactional sex, or I have a sugar daddy; Money sent by family members (inside or outside of Nigeria); I am in survival mode (example: recycling and selling in slums, begging). Participants choosing any of the last five sources of income were categorised as facing economic precarity.

*Food insecurity* is a self-reported response to the question: "Since the COVID-19 crisis began, do you eat less or skip meals because there was not enough money for food?". The answer was either "yes" or "no". The question was adapted from the questionnaire by Santos and colleagues(21).

### *Macrosocial markers of vulnerability*

*Survivor of gender-based violence* was measured using the participants' experience of gender-based violence during the COVID-19 crisis. The possible answers to the question "Do you feel that you are currently experiencing" were: "More violence than before the COVID-19 crisis", "The same level of violence as before the COVID-19 crisis", "Less violence than before the COVID-19 crisis", "I am not experiencing any violence", "I cannot or do not wish to answer this question".

We considered two *macrosocial categories of vulnerability*: those who engaged in sex work and those who engaged in transactional sex. These categories are not mutually exclusive. Participants can identify themselves with more than one category. We adjusted the model to account for the interaction between the two categories.

### *Statistical methods*

We first performed a bivariate analysis to study the associations between the independent variables and people on the move per self-declared HIV status. We used Pearson's chi-squared test of association (See the results section in the main document and supplement S2).

We controlled for confounders by performing separate regressions without (A) and with (B) potential confounders and compared the coefficients of each group  $((B-A)/A=C)$ . Confounders were suspected if  $C > 10\%$ . We did not identify confounding variables in the regression model.

We subsequently developed the inferential statistical analysis with a logistic regression model per HIV status. We focused on HIV-positive women and girls on the move compared to other vulnerable women and girls living with HIV but not on the move.

Based on the experience of the partnering community-based organisations, the literature review and the examination of the dataset, we anticipated that some variables might interact with each other, as can happen in reality. We enabled the interactions between the fact of engaging in sex work and engaging in transactional sex. Other interactions were included as some measures of variables might be closely related. It is the case, for example, with the variables "current main source of income" and "food insecurity".

We conducted post-estimation tests, including likelihood ratio chi-square, and controlled for the hypothesis of a null value for the independent variables for each model. In addition, we performed additional analyses of variance, margins, collinearity, and goodness-of-fit. Finally, we controlled for specification errors and tested whether or not the interactions between potentially related variables such as living in precarity and food insecurity. We similarly controlled for interaction between sex work and transactional sex. We considered statistical significance at a p-value  $< 0.05$  and reported the strength of association and effect size confidence intervals accordingly(22). All statistical analyses were performed using STATA 16.

**S2: Conceptual framework of the current study**

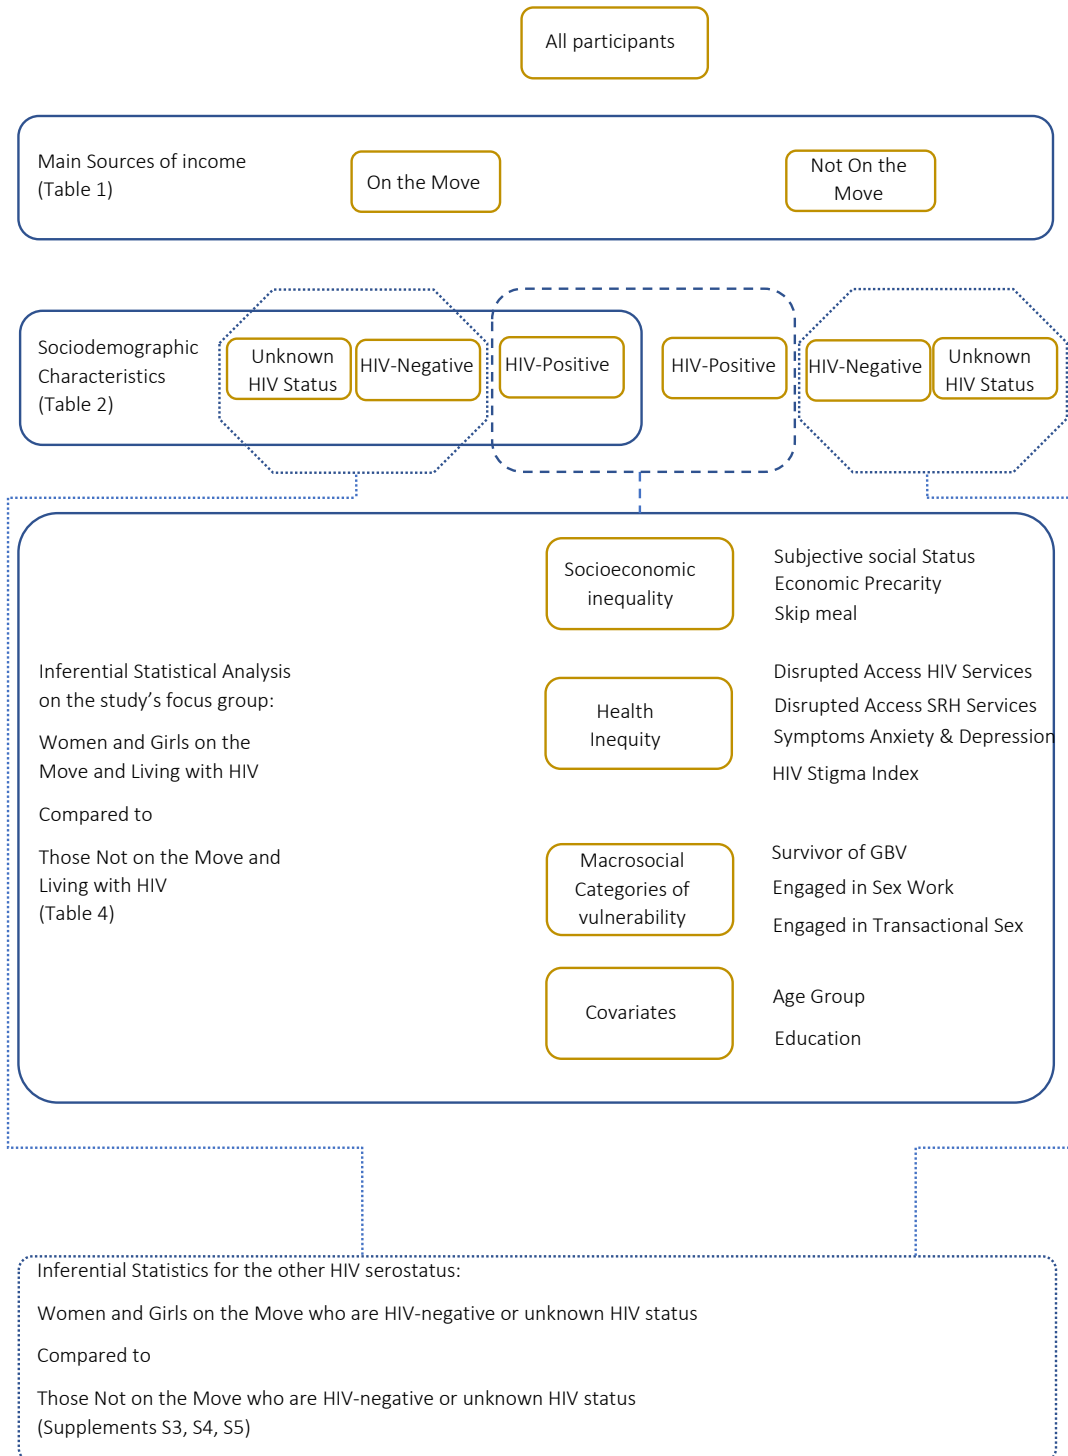

**S3: Categories of people on the move, per HIV status**

|                                           | Total                                  |      | Self-reported HIV- |      | self-reported HIV+ |      | Don't know |     |
|-------------------------------------------|----------------------------------------|------|--------------------|------|--------------------|------|------------|-----|
|                                           | n = (3442)                             |      | n = (1402)         |      | n = (1613)         |      | n = (427)  |     |
|                                           | %                                      | (n)  | %                  | (n)  | %                  | (n)  | %          | (n) |
|                                           | Pearson chi2(12) = 126.2211 Pr = 0.000 |      |                    |      |                    |      |            |     |
| <b>Participants Not on the move</b>       | 76,6%                                  | 2637 | 80,1%              | 1123 | 75,5%              | 1218 | 69,3%      | 296 |
| <b>People on the move categories</b>      |                                        |      |                    |      |                    |      |            |     |
| Migrants                                  | 1,3%                                   | 46   | 0,8%               | 11   | 1,9%               | 31   | 0,9%       | 4   |
| Refugee                                   | 2,4%                                   | 82   | 3,9%               | 55   | 0,2%               | 3    | 5,6%       | 24  |
| Asylum seeker                             | 0,1%                                   | 3    | 0,1%               | 1    | 0,1%               | 2    | 0,0%       | 0   |
| Returning migrant                         | 4,0%                                   | 139  | 3,1%               | 43   | 5,5%               | 89   | 1,6%       | 7   |
| Internally displaced people (IDP)         | 12,5%                                  | 430  | 10,1%              | 142  | 13,0%              | 209  | 18,5%      | 79  |
| <b>Don't know or don't wish to answer</b> | 3,1%                                   | 105  | 1,9%               | 27   | 3,8%               | 61   | 4,0%       | 17  |

## S4: Sociodemographic characteristics of the participants

|                                                        | Total    |      | Adolescent girls and women on the move |     |                          |     |                                |     | Adolescent girls and women NOT on the move |     |                           |     |                               |     |
|--------------------------------------------------------|----------|------|----------------------------------------|-----|--------------------------|-----|--------------------------------|-----|--------------------------------------------|-----|---------------------------|-----|-------------------------------|-----|
|                                                        | (N=3337) |      | HIV-negative<br>(N= 252)               |     | HIV-positive<br>(N= 334) |     | Unknown/undeclared<br>(N= 114) |     | HIV-negative<br>(N= 1123)                  |     | HIV-positive<br>(N= 1218) |     | Unknown/undeclared<br>(N=296) |     |
|                                                        | %        | (n)  | %                                      | (n) | %                        | (n) | %                              | (n) | %                                          | (n) | %                         | (n) | %                             | (n) |
| <b>Age groups</b>                                      |          |      | Pearson chi2(4) = 31.1479 Pr = 0.000   |     |                          |     |                                |     | Pearson chi2(4) = 53.4218 Pr = 0.000       |     |                           |     |                               |     |
| Adolescent girls & young women (15-24)                 | 34.9%    | 1166 | 23.0%                                  | 58  | 24.9%                    | 83  | 46.5%                          | 53  | 33.1%                                      | 372 | 35.7%                     | 435 | 55.7%                         | 165 |
| Adults (25-44)                                         | 55.1%    | 1840 | 59.9%                                  | 151 | 56.3%                    | 188 | 31.6%                          | 36  | 58.9%                                      | 661 | 56.8%                     | 692 | 37.8%                         | 112 |
| Older adults (45+)                                     | 9.9%     | 331  | 17.1%                                  | 43  | 18.9%                    | 63  | 21.9%                          | 25  | 8.0%                                       | 90  | 7.5%                      | 91  | 6.4%                          | 19  |
| <b>Education (highest degree completed)</b>            |          |      | Pearson chi2(4) = 12.5913 Pr = 0.013   |     |                          |     |                                |     | Pearson chi2(4) = 18.3786 Pr = 0.001       |     |                           |     |                               |     |
| From none to primary education                         | 36.6%    | 1223 | 59.5%                                  | 150 | 61.1%                    | 204 | 72.8%                          | 83  | 27.8%                                      | 312 | 29.6%                     | 360 | 38.5%                         | 114 |
| Secondary education                                    | 44.0%    | 1469 | 29.8%                                  | 75  | 32.6%                    | 109 | 25.4%                          | 29  | 47.1%                                      | 529 | 49.4%                     | 602 | 42.2%                         | 125 |
| Post-secondary or University degree                    | 19.1%    | 636  | 10.3%                                  | 26  | 6.3%                     | 21  | 1.8%                           | 2   | 24.9%                                      | 280 | 20.6%                     | 251 | 18.9%                         | 56  |
| Missing                                                | 0.3%     | 9    | 0.4%                                   | 1   | 0.0%                     | 0   | 0.0%                           | 0   | 0.2%                                       | 2   | 0.4%                      | 5   | 0.3%                          | 1   |
| <b>Geopolitical Zones</b>                              |          |      | Pearson chi2(10) = 322.3023 Pr = 0.000 |     |                          |     |                                |     | Pearson chi2(10) = 253.4577 Pr = 0.000     |     |                           |     |                               |     |
| <b>1</b> North Central                                 | 25.8%    | 860  | 6.7%                                   | 17  | 54.2%                    | 181 | 7.0%                           | 8   | 12.9%                                      | 145 | 35.9%                     | 437 | 24.3%                         | 72  |
| <b>2</b> North East                                    | 18.2%    | 608  | 30.2%                                  | 76  | 2.1%                     | 7   | 30.7%                          | 35  | 23.4%                                      | 263 | 12.9%                     | 157 | 23.6%                         | 70  |
| <b>3</b> North West                                    | 11.6%    | 387  | 4.0%                                   | 10  | 2.7%                     | 9   | 7.0%                           | 8   | 16.9%                                      | 190 | 10.3%                     | 126 | 14.9%                         | 44  |
| <b>4</b> South East                                    | 21.0%    | 701  | 24.2%                                  | 61  | 24.9%                    | 83  | 29.8%                          | 34  | 19.4%                                      | 218 | 20.4%                     | 249 | 18.9%                         | 56  |
| <b>5</b> South South                                   | 14.1%    | 472  | 28.6%                                  | 72  | 0.6%                     | 2   | 20.2%                          | 23  | 20.4%                                      | 229 | 9.2%                      | 112 | 11.5%                         | 34  |
| <b>6</b> South West                                    | 9.1%     | 302  | 6.3%                                   | 16  | 15.6%                    | 52  | 4.4%                           | 5   | 6.5%                                       | 73  | 11.2%                     | 137 | 6.4%                          | 19  |
| Missing                                                | 0.2%     | 7    | 0.0%                                   | 0   | 0.0%                     | 0   | 0.9%                           | 1   | 0.4%                                       | 5   | 0.0%                      | 0   | 0.3%                          | 1   |
| <b>Health inequity</b>                                 |          |      |                                        |     |                          |     |                                |     |                                            |     |                           |     |                               |     |
| <b>Mental health (sympt. anxiety &amp; depression)</b> |          |      | Pearson chi2(6) = 12.4130 Pr = 0.053   |     |                          |     |                                |     | Pearson chi2(6) = 25.8122 Pr = 0.000       |     |                           |     |                               |     |
| None                                                   | 24.9%    | 832  | 25.8%                                  | 65  | 30.8%                    | 103 | 40.4%                          | 46  | 27.9%                                      | 313 | 18.5%                     | 225 | 27.0%                         | 80  |
| Mild symptoms                                          | 28.9%    | 966  | 28.2%                                  | 71  | 26.3%                    | 88  | 23.7%                          | 27  | 29.0%                                      | 326 | 30.1%                     | 367 | 29.4%                         | 87  |
| Moderate symptoms                                      | 23.9%    | 797  | 30.6%                                  | 77  | 20.4%                    | 68  | 20.2%                          | 23  | 23.7%                                      | 266 | 24.5%                     | 298 | 22.0%                         | 65  |
| Severe symptoms                                        | 13.8%    | 461  | 12.7%                                  | 32  | 9.9%                     | 33  | 14.0%                          | 16  | 14.2%                                      | 160 | 15.4%                     | 188 | 10.8%                         | 32  |
| Missing                                                | 8.4%     | 281  | 2.8%                                   | 7   | 12.6%                    | 42  | 1.8%                           | 2   | 5.2%                                       | 58  | 11.5%                     | 140 | 10.8%                         | 32  |
| <b>Disrupted access to HIV services</b>                |          |      | Pearson chi2(2) = 109.0852 Pr = 0.000  |     |                          |     |                                |     | Pearson chi2(2) = 357.4721 Pr = 0.000      |     |                           |     |                               |     |
| No                                                     | 57.4%    | 1914 | 81.3%                                  | 205 | 50.0%                    | 167 | 87.7%                          | 100 | 70.4%                                      | 791 | 34.6%                     | 421 | 77.7%                         | 230 |
| Yes                                                    | 39.1%    | 1304 | 11.1%                                  | 28  | 42.5%                    | 142 | 4.4%                           | 5   | 28.7%                                      | 322 | 61.4%                     | 748 | 19.9%                         | 59  |

|  |                                                            |       |      |                                        |     |       |      |       |                                       |       |      |       |     |       |     |
|--|------------------------------------------------------------|-------|------|----------------------------------------|-----|-------|------|-------|---------------------------------------|-------|------|-------|-----|-------|-----|
|  | Missing                                                    | 3.6%  | 119  | 7.5%                                   | 19  | 7.5%  | 25   | 7.9%  | 9                                     | 0.9%  | 10   | 4.0%  | 49  | 2.4%  | 7   |
|  | <b>Disrupted access to SRH services</b>                    |       |      | Pearson chi2(2) = 15.2330 Pr = 0.000   |     |       |      |       | Pearson chi2(2) = 69.4531 Pr = 0.000  |       |      |       |     |       |     |
|  | No                                                         | 68.6% | 2288 | 85.3%                                  | 215 | 74.3% | 248  | 80.7% | 92                                    | 72.7% | 816  | 56.2% | 684 | 78.7% | 233 |
|  | Yes                                                        | 27.2% | 908  | 7.1%                                   | 18  | 17.7% | 59   | 10.5% | 12                                    | 26.4% | 296  | 38.0% | 463 | 20.3% | 60  |
|  | Missing                                                    | 4.2%  | 141  | 7.5%                                   | 19  | 8.1%  | 27   | 8.8%  | 10                                    | 1.0%  | 11   | 5.8%  | 71  | 1.0%  | 3   |
|  | <b>HIV stigma</b>                                          | Mean  | SD   |                                        |     | Mean  | SD   |       |                                       | Mean  | SD   |       |     |       |     |
|  | HIV stigma score                                           | 32.53 | 8.11 |                                        |     | 32.12 | 7.52 |       |                                       | 32.61 | 8.21 |       |     |       |     |
|  | Sub-component personalised stigma                          | 7.68  | 2.53 |                                        |     | 8.07  | 2.39 |       |                                       | 7.61  | 2.54 |       |     |       |     |
|  | Sub-component disclosure concerns                          | 9.38  | 2.21 |                                        |     | 9.20  | 2.03 |       |                                       | 9.41  | 2.24 |       |     |       |     |
|  | Sub-component concerns about public attitudes              | 8.10  | 2.40 |                                        |     | 7.90  | 2.44 |       |                                       | 8.13  | 2.39 |       |     |       |     |
|  | Sub-component negative self-image                          | 7.34  | 2.54 |                                        |     | 7.37  | 2.50 |       |                                       | 7.33  | 2.54 |       |     |       |     |
|  | <b>Economic inequalities</b>                               |       |      |                                        |     |       |      |       |                                       |       |      |       |     |       |     |
|  | <b>Access to COVID-19 support measures</b>                 |       |      | Pearson chi2(12) = 102.4880 Pr = 0.000 |     |       |      |       | Pearson chi2(12) = 54.4098 Pr = 0.000 |       |      |       |     |       |     |
|  | I did not know there was a special relief measure for me   | 47.2% | 1576 | 70.2%                                  | 177 | 48.8% | 163  | 76.3% | 87                                    | 44.8% | 503  | 39.2% | 477 | 57.1% | 169 |
|  | These measures are not applicable to me                    | 3.7%  | 123  | 7.5%                                   | 19  | 0.6%  | 2    | 9.6%  | 11                                    | 4.4%  | 49   | 2.8%  | 34  | 2.7%  | 8   |
|  | I have been denied access                                  | 18.5% | 618  | 7.9%                                   | 20  | 25.4% | 85   | 4.4%  | 5                                     | 21.0% | 236  | 18.4% | 224 | 16.2% | 48  |
|  | I can access these support measures if I want, but I don't | 3.3%  | 110  | 1.6%                                   | 4   | 1.8%  | 6    | 0.0%  | 0                                     | 4.9%  | 55   | 3.5%  | 43  | 0.7%  | 2   |
|  | Yes I applied, and I am waiting for the support measure    | 15.3% | 512  | 6.0%                                   | 15  | 7.2%  | 24   | 3.5%  | 4                                     | 15.8% | 177  | 20.1% | 245 | 15.9% | 47  |
|  | Yes I applied, and I received these support measures       | 7.7%  | 257  | 4.0%                                   | 10  | 13.8% | 46   | 4.4%  | 5                                     | 6.5%  | 73   | 8.8%  | 107 | 5.4%  | 16  |
|  | I cannot or do not wish to answer                          | 2.3%  | 78   | 1.6%                                   | 4   | 1.5%  | 5    | 0.0%  | 0                                     | 2.2%  | 25   | 3.3%  | 40  | 1.4%  | 4   |
|  | Missing                                                    | 1.9%  | 63   | 1.2%                                   | 3   | 0.9%  | 3    | 1.8%  | 2                                     | 0.4%  | 5    | 3.9%  | 48  | 0.7%  | 2   |
|  | <b>Subjective socioeconomic status (SES)</b>               |       |      | Pearson chi2(4) = 23.4354 Pr = 0.000   |     |       |      |       | Pearson chi2(4) = 6.0284 Pr = 0.197   |       |      |       |     |       |     |
|  | Lower tercile                                              | 36.3% | 1211 | 39.3%                                  | 99  | 53.0% | 177  | 51.8% | 59                                    | 31.3% | 351  | 34.9% | 425 | 33.8% | 100 |
|  | Middle tercile                                             | 44.1% | 1473 | 50.0%                                  | 126 | 31.1% | 104  | 38.6% | 44                                    | 48.2% | 541  | 43.2% | 526 | 44.6% | 132 |
|  | Higher tercile                                             | 18.2% | 607  | 10.7%                                  | 27  | 15.6% | 52   | 8.8%  | 10                                    | 20.0% | 225  | 18.9% | 230 | 21.3% | 63  |
|  | Missing                                                    | 1.4%  | 46   | 0.0%                                   | 0   | 0.3%  | 1    | 0.9%  | 1                                     | 0.5%  | 6    | 3.0%  | 37  | 0.3%  | 1   |
|  | <b>Subjective social standing status (SSS)</b>             |       |      | Pearson chi2(4) = 23.5919 Pr = 0.000   |     |       |      |       | Pearson chi2(4) = 6.6856 Pr = 0.153   |       |      |       |     |       |     |
|  | Lower tercile                                              | 47.9% | 1599 | 47.2%                                  | 119 | 62.6% | 209  | 64.9% | 74                                    | 46.5% | 522  | 44.8% | 546 | 43.6% | 129 |
|  | Middle tercile                                             | 29.3% | 979  | 33.3%                                  | 84  | 20.1% | 67   | 27.2% | 31                                    | 28.9% | 325  | 31.6% | 385 | 29.4% | 87  |
|  | Higher tercile                                             | 21.5% | 719  | 19.4%                                  | 49  | 17.4% | 58   | 7.9%  | 9                                     | 24.1% | 271  | 20.8% | 253 | 26.7% | 79  |
|  | Missing                                                    | 1.2%  | 40   | 0.0%                                   | 0   | 0.0%  | 0    | 0.0%  | 0                                     | 0.4%  | 5    | 2.8%  | 34  | 0.3%  | 1   |



|  |                                                  |       |      |                                       |     |       |     |       |    |                                       |     |       |     |       |     |
|--|--------------------------------------------------|-------|------|---------------------------------------|-----|-------|-----|-------|----|---------------------------------------|-----|-------|-----|-------|-----|
|  | <b>Skip meals because not enough money</b>       |       |      | Pearson chi2(2) = 8.7438 Pr = 0.013   |     |       |     |       |    | Pearson chi2(2) = 16.9486 Pr = 0.000  |     |       |     |       |     |
|  | No                                               | 20.9% | 699  | 21.0%                                 | 53  | 13.8% | 46  | 23.7% | 27 | 25.6%                                 | 287 | 19.7% | 240 | 15.5% | 46  |
|  | Yes                                              | 76.1% | 2540 | 73.8%                                 | 186 | 85.0% | 284 | 76.3% | 87 | 73.0%                                 | 820 | 75.5% | 919 | 82.4% | 244 |
|  | Missing                                          | 2.9%  | 98   | 5.2%                                  | 13  | 1.2%  | 4   | 0.0%  | 0  | 1.4%                                  | 16  | 4.8%  | 59  | 2.0%  | 6   |
|  | <b>Current main source of income</b>             |       |      | Pearson chi2(12) = 47.3186 Pr = 0.000 |     |       |     |       |    | Pearson chi2(12) = 50.9921 Pr = 0.000 |     |       |     |       |     |
|  | No income/survival mode                          | 18.8% | 629  | 20.2%                                 | 51  | 24.6% | 82  | 38.6% | 44 | 16.2%                                 | 182 | 17.2% | 210 | 20.3% | 60  |
|  | Transactional sex                                | 15.0% | 499  | 8.3%                                  | 21  | 17.7% | 59  | 9.6%  | 11 | 18.2%                                 | 204 | 14.9% | 181 | 7.8%  | 23  |
|  | Social transfer, including pension               | 1.3%  | 42   | 0.4%                                  | 1   | 1.5%  | 5   | 0.0%  | 0  | 1.0%                                  | 11  | 1.4%  | 17  | 2.7%  | 8   |
|  | Remittances or charity                           | 10.4% | 347  | 5.2%                                  | 13  | 9.0%  | 30  | 11.4% | 13 | 9.5%                                  | 107 | 10.5% | 128 | 18.9% | 56  |
|  | Agriculture                                      | 11.3% | 376  | 25.0%                                 | 63  | 21.0% | 70  | 21.1% | 24 | 8.0%                                  | 90  | 8.9%  | 109 | 6.8%  | 20  |
|  | self-employed, petty trade                       | 37.0% | 1235 | 38.1%                                 | 96  | 23.1% | 77  | 17.5% | 20 | 42.1%                                 | 473 | 37.4% | 455 | 38.5% | 114 |
|  | Paid work                                        | 4.6%  | 154  | 2.8%                                  | 7   | 2.4%  | 8   | 1.8%  | 2  | 4.5%                                  | 51  | 6.1%  | 74  | 4.1%  | 12  |
|  | Missing                                          | 1.6%  | 55   | 0.0%                                  | 0   | 0.9%  | 3   | 0.0%  | 0  | 0.4%                                  | 5   | 3.6%  | 44  | 1.0%  | 3   |
|  | <b>Macrosocial markers of vulnerability</b>      |       |      |                                       |     |       |     |       |    |                                       |     |       |     |       |     |
|  | <b>Survivor of gender-based violence</b>         |       |      | Pearson chi2(6) = 24.6323 Pr = 0.000  |     |       |     |       |    | Pearson chi2(6) = 24.6260 Pr = 0.000  |     |       |     |       |     |
|  | I am not experiencing any violence               | 69.5% | 2319 | 74.6%                                 | 188 | 56.3% | 188 | 66.7% | 76 | 73.6%                                 | 827 | 66.1% | 805 | 79.4% | 235 |
|  | Less violence than before COVID-19               | 6.7%  | 222  | 4.4%                                  | 11  | 4.8%  | 16  | 2.6%  | 3  | 5.4%                                  | 61  | 8.5%  | 104 | 9.1%  | 27  |
|  | The same level of violence as before COVID-19    | 9.2%  | 306  | 9.9%                                  | 25  | 20.4% | 68  | 13.2% | 15 | 7.7%                                  | 86  | 7.9%  | 96  | 5.4%  | 16  |
|  | More violence than violence than before COVID-19 | 9.4%  | 313  | 7.5%                                  | 19  | 14.1% | 47  | 13.2% | 15 | 9.6%                                  | 108 | 9.1%  | 111 | 4.4%  | 13  |
|  | Missing                                          | 5.3%  | 177  | 3.6%                                  | 9   | 4.5%  | 15  | 4.4%  | 5  | 3.7%                                  | 41  | 8.4%  | 102 | 1.7%  | 5   |
|  | <b>Engaged in transactional sex</b>              |       |      | Pearson chi2(2) = 11.9471 Pr = 0.003  |     |       |     |       |    | Pearson chi2(2) = 106.6086 Pr = 0.000 |     |       |     |       |     |
|  | No                                               | 50.2% | 1675 | 74.6%                                 | 188 | 61.4% | 205 | 75.4% | 86 | 48.3%                                 | 542 | 36.8% | 448 | 69.6% | 206 |
|  | Yes                                              | 43.2% | 1440 | 21.8%                                 | 55  | 30.5% | 102 | 17.5% | 20 | 48.1%                                 | 540 | 53.8% | 655 | 23.0% | 68  |
|  | Missing                                          | 6.7%  | 222  | 3.6%                                  | 9   | 8.1%  | 27  | 7.0%  | 8  | 3.7%                                  | 41  | 9.4%  | 115 | 7.4%  | 22  |
|  | <b>Engaged in sex work</b>                       |       |      | Pearson chi2(2) = 6.6533 Pr = 0.036   |     |       |     |       |    | Pearson chi2(2) = 78.3291 Pr = 0.000  |     |       |     |       |     |
|  | No                                               | 55.6% | 1856 | 76.6%                                 | 193 | 70.4% | 235 | 76.3% | 87 | 52.4%                                 | 588 | 43.8% | 534 | 74.0% | 219 |
|  | Yes                                              | 38.0% | 1267 | 19.0%                                 | 48  | 24.0% | 80  | 12.3% | 14 | 43.1%                                 | 484 | 47.4% | 577 | 21.6% | 64  |
|  | Missing                                          | 6.4%  | 214  | 4.4%                                  | 11  | 5.7%  | 19  | 11.4% | 13 | 4.5%                                  | 51  | 8.8%  | 107 | 4.4%  | 13  |

**S5: Change in incomes and main current sources of income among vulnerable women and girls in Nigeria****Table S5.1: Change in incomes and main current sources of income among vulnerable women and girls in Nigeria**

|                   | n=700 | Lost all their income | Reduced by more than half | Reduced by about half | Reduced by less than half | No change | Increase | Missing |
|-------------------|-------|-----------------------|---------------------------|-----------------------|---------------------------|-----------|----------|---------|
| No income         | 177   | 13.6%                 | 5.6%                      | 6.8%                  | 2.8%                      | 64.4%     | 2.3%     | 4.5%    |
| Transactional sex | 91    | 2.2%                  | 29.7%                     | 11.0%                 | 5.5%                      | 34.1%     | 15.4%    | 2.2%    |
| Social transfer   | 6     | -                     | 33.3%                     | -                     | 33.3%                     | 16.7%     | -        | 16.7%   |
| Remittances       | 56    | 12.5%                 | 21.4%                     | 26.8%                 | 14.3%                     | 21.4%     | 1.8%     | 1.8%    |
| Agriculture       | 157   | 4.5%                  | 42.0%                     | 22.9%                 | 12.1%                     | 16.6%     | 1.3%     | 0.6%    |
| Self-employed     | 193   | 10.4%                 | 28.0%                     | 26.4%                 | 14.0%                     | 18.7%     | 1.6%     | 1.0%    |
| Paid work         | 17    | 5.9%                  | -                         | 11.8%                 | -                         | 82.4%     | -        | -       |
| Missing           | 3     | -                     | -                         | -                     | -                         | 33.3%     | -        | 66.7%   |

Pearson  $\chi^2(42) = 317.6328$  Pr = 0.000 Cramér's V = 0.2750

## S5: Health Inequities, per population groups

Table S5.2: Health inequities among all participants, per categories

| All Sample                                   | Disrupted access to HIV services<br>N = (2571) | Disrupted access to SRH services<br>N = (2552) | Symptoms of anxiety and depression<br>N = (2407) |
|----------------------------------------------|------------------------------------------------|------------------------------------------------|--------------------------------------------------|
|                                              | Pearson chi2(6) = 71.5390<br>Pr = 0.000        | Pearson chi2(6) = 103.3465<br>Pr = 0.000       | Pearson chi2(6) = 15.5767<br>Pr = 0.016          |
| <b>NOT on the move (n = 2637)</b>            | 43.9%                                          | 32.1%                                          | 41.9%                                            |
| <b>Women and girls on the move (n = 700)</b> |                                                |                                                |                                                  |
| Migrants (n = 46)                            | 45.5%                                          | 38.6%                                          | 23.8%                                            |
| Refugee (n = 82)                             | 19.5%                                          | 9.8%                                           | 25.9%                                            |
| Asylum seeker (n = 3)                        | 0.0%                                           | 33.3%                                          | 0.0%                                             |
| Returning migrant (n = 139)                  | 30.7%                                          | 19.3%                                          | 45.0%                                            |
| Internally displaced people (n = 430)        | 25.7%                                          | 10.2%                                          | 40.6%                                            |
| <b>Missing or did not know (n = 195)</b>     | 44.6%                                          | 31.0%                                          | 45.3%                                            |

Table S5.3: Health inequities among participants living with HIV, per categories

| Only among those HIV+                        | Disrupted access HIV services<br>N = (1169) | Disrupted access SRH services<br>N = (1147) | Symptoms of anxiety and depression<br>N = (1078) |
|----------------------------------------------|---------------------------------------------|---------------------------------------------|--------------------------------------------------|
|                                              | Pearson chi2(6) = 45.5110<br>Pr = 0.000     | Pearson chi2(6) = 73.6066<br>Pr = 0.000     | Pearson chi2(6) = 15.5767<br>Pr = 0.016          |
| <b>NOT on the move (n = 1218)</b>            | 64.0%                                       | 40.4%                                       | 45.1%                                            |
| <b>Women and girls on the move (n = 334)</b> |                                             |                                             |                                                  |
| Migrants (n = 31)                            | 69.0%                                       | 58.6%                                       | 25.9%                                            |
| Refugee (n = 3)                              | 66.7%                                       | -                                           | -                                                |
| Asylum seeker (n = 2)                        | -                                           | 50.0%                                       | -                                                |
| Returning migrant (n = 89)                   | 38.2%                                       | 22.1%                                       | 50.8%                                            |
| Internally displaced people (n = 209)        | 45.4%                                       | 12.7%                                       | 31.2%                                            |
| <b>Missing or did not know (n = 111)</b>     | 69.0%                                       | 44.8%                                       | 58.9%                                            |

## S6: Logistic regression People on the move, per HIV status

| People on the move                             |                                                          | HIV-negative |         |        | HIV-positive |         |        | I don't know or don't want to answer |         |        |       |       |         |
|------------------------------------------------|----------------------------------------------------------|--------------|---------|--------|--------------|---------|--------|--------------------------------------|---------|--------|-------|-------|---------|
|                                                |                                                          | aOR          | p-value | 95% CI | aOR          | p-value | 95% CI | aOR                                  | p-value | 95% CI |       |       |         |
| <b>Age groups</b>                              |                                                          |              |         |        |              |         |        |                                      |         |        |       |       |         |
|                                                | Adolescent girls & young women (15-24)                   | 0.758        | 0.209   | 0.493  | 1.167        | 0.601   | 0.013  | 0.402                                | 0.898   | 0.899  | 0.773 | 0.434 | 1.859   |
|                                                | Adults (25-44)                                           | base         |         |        |              | base    |        |                                      |         | base   |       |       |         |
|                                                | Older adults (45+)                                       | 0.888        | 0.633   | 0.544  | 1.448        | 1.041   | 0.873  | 0.635                                | 1.707   | 3.539  | 0.008 | 1.388 | 9.021   |
| <b>Education level</b>                         |                                                          |              |         |        |              |         |        |                                      |         |        |       |       |         |
|                                                | From none to primary education                           | 2.888        | 0.000   | 1.963  | 4.251        | 3.375   | 0.000  | 2.355                                | 4.837   | 3.063  | 0.001 | 1.562 | 6.007   |
|                                                | Secondary education                                      | base         |         |        |              | base    |        |                                      |         | base   |       |       |         |
|                                                | Post-secondary or University degree                      | 0.597        | 0.065   | 0.346  | 1.032        | 0.596   | 0.092  | 0.326                                | 1.088   | 0.235  | 0.095 | 0.043 | 1.288   |
| <b>Health inequity</b>                         |                                                          |              |         |        |              |         |        |                                      |         |        |       |       |         |
|                                                | Disrupted access to HIV services                         | 1.188        | 0.206   | 0.910  | 1.552        | 1.426   | 0.033  | 1.029                                | 1.977   | 2.794  | 0.000 | 1.631 | 4.786   |
|                                                | Disrupted access to SRH services                         | 0.400        | 0.006   | 0.208  | 0.769        | 0.503   | 0.003  | 0.322                                | 0.787   | 4.705  | 0.018 | 1.308 | 16.931  |
| <b>Symptoms of anxiety and depression</b>      |                                                          |              |         |        |              |         |        |                                      |         |        |       |       |         |
| <b>Economic inequality</b>                     |                                                          |              |         |        |              |         |        |                                      |         |        |       |       |         |
|                                                | Subjective social standing status                        |              |         |        |              |         |        |                                      |         |        |       |       |         |
|                                                | Lower tercile                                            | 0.811        | 0.285   | 0.552  | 1.191        | 2.336   | 0.000  | 1.537                                | 3.552   | 1.838  | 0.069 | 0.953 | 3.543   |
|                                                | Middle tercile                                           | base         |         |        |              | base    |        |                                      |         | base   |       |       |         |
|                                                | Higher tercile                                           | 1.014        | 0.953   | 0.635  | 1.619        | 1.571   | 0.102  | 0.915                                | 2.697   | 0.371  | 0.048 | 0.138 | 0.993   |
|                                                | Economic precarity                                       | 0.735        | 0.396   | 0.361  | 1.496        | 6.437   | 0.000  | 2.419                                | 17.129  | 0.423  | 0.218 | 0.108 | 1.663   |
|                                                | Skip meals                                               | 1.120        | 0.657   | 0.681  | 1.841        | 4.891   | 0.000  | 2.064                                | 11.589  | 0.255  | 0.029 | 0.075 | 0.868   |
| <b>Macrosocial categories of vulnerability</b> |                                                          |              |         |        |              |         |        |                                      |         |        |       |       |         |
| <b>Survivor or gender-based violence</b>       |                                                          |              |         |        |              |         |        |                                      |         |        |       |       |         |
|                                                | Not experiencing any violence                            | base         |         |        |              | base    |        |                                      |         | base   |       |       |         |
|                                                | Less violence than before the COVID-19 crisis            | 1.426        | 0.368   | 0.658  | 3.089        | 1.532   | 0.244  | 0.747                                | 3.140   | 0.665  | 0.591 | 0.150 | 2.954   |
|                                                | The same level of violence as before the COVID-19 crisis | 1.702        | 0.067   | 0.963  | 3.009        | 5.499   | 0.000  | 3.326                                | 9.093   | 2.980  | 0.040 | 1.049 | 8.465   |
|                                                | More violence than before the COVID-19 crisis            | 0.227        | 0.015   | 0.069  | 0.748        | 4.770   | 0.000  | 2.704                                | 8.416   | 2.255  | 0.372 | 0.378 | 13.443  |
|                                                | Engaged in sex work                                      | 0.687        | 0.647   | 0.138  | 3.431        | 0.132   | 0.017  | 0.025                                | 0.698   | 13.140 | 0.111 | 0.551 | 313.167 |
|                                                | Engaged in transactional sex                             | 0.469        | 0.099   | 0.191  | 1.152        | 0.796   | 0.446  | 0.442                                | 1.433   | 1.006  | 0.996 | 0.113 | 8.967   |
|                                                | Interaction precarious#skipmeals                         | 1.004        | 0.992   | 0.446  | 2.259        | 0.164   | 0.001  | 0.058                                | 0.467   | 4.036  | 0.067 | 0.908 | 17.933  |
|                                                | Interaction sexwork#transasex                            | 1.251        | 0.814   | 0.193  | 8.084        | 2.645   | 0.281  | 0.451                                | 15.491  | 0.037  | 0.100 | 0.001 | 1.884   |

|                |         |       |       |       |         |       |       |       |         |       |       |       |
|----------------|---------|-------|-------|-------|---------|-------|-------|-------|---------|-------|-------|-------|
| Constant       | 0.177   | 0.000 | 0.072 | 0.435 | 0.028   | 0.000 | 0.009 | 0.083 | 0.045   | 0.002 | 0.006 | 0.337 |
| N              | 1162    |       |       |       | 1141    |       |       |       | 320     |       |       |       |
| Log-likelihood | -452.60 |       |       |       | -443.52 |       |       |       | -143.98 |       |       |       |
| LR chi2(18)    | 165.18  |       |       |       | 307.68  |       |       |       | 95.98   |       |       |       |
| prob> chi2     | 0.000   |       |       |       | 0.000   |       |       |       | 0.000   |       |       |       |

## References

1. Folayan MO, Arije O, Enemo A, Sunday A, Muhammad A, Nyako HY, et al. Associations between COVID-19 vaccine hesitancy and the experience of violence among women and girls living with and at risk of HIV in Nigeria. *African journal of AIDS research*. 2022;1-11.
2. Lamontagne E, Folayan MO, Arije O, Enemo A, Sunday A, Muhammad A, et al. The effects of COVID-19 on food insecurity, financial vulnerability and housing insecurity among women and girls living with or at risk of HIV in Nigeria. *African Journal of AIDS Research*. 2022;1-9.
3. Folayan MO, Arije O, Enemo A, Sunday A, Muhammad A, Nyako Hy, et al. Factors associated with poor access to HIV and sexual and reproductive health services in Nigeria for women and girls living with HIV during the COVID-19 pandemic. *African Journal of AIDS Research*. 2022;21(2):171-82.
4. Mirzaei A, Carter SR, Patanwala AE, Schneider CR. Missing data in surveys: Key concepts, approaches, and applications. *Research in Social and Administrative Pharmacy*. 2022;18(2):2308-16.
5. VanVoorhis CW, Morgan BL. Understanding power and rules of thumb for determining sample sizes. *Tutorials in quantitative methods for psychology*. 2007;3(2):43-50.
6. United Nations Statistics Division. Recommendations on Statistics of International Migration, Revision 1. 1998.
7. Meyer A. People on the move: Handbook of selected terms and concepts: Hague Process on Refugees and Migration; 2008.
8. International Organization for Migration. International migration law - Glossary on migration. Geneva, CH; 2019.
9. Kingdon MJ, Barton S, Eddy J, Halkitis PN. Facilitators and barriers to HIV status disclosure among HIV-positive MSM age 50 and older. *Journal of gay & lesbian mental health*. 2016;20(1):41-56.
10. Grainger C. Understanding disclosure behaviours in HIV-positive young people. *Journal of Infection Prevention*. 2017;18(1):35-9.
11. Nwaozuru U, Iwelunmor J, Ong JJ, Salah S, Obiezu-Umeh C, Ezechi O, et al. Preferences for HIV testing services among young people in Nigeria. *BMC health services research*. 2019;19(1):1-9.
12. Ross MW, Rosser BRS. Measurement and correlates of internalized homophobia: A factor analytic study. *Journal of Clinical Psychology*. 1996(52):15-21.
13. Seasholtz MB, Kowalski B. The parsimony principle applied to multivariate calibration. *Analytica Chimica Acta*. 1993;277(2):165-77.
14. United Nations Population Fund. Surveys and assessments on young people and COVID-19: Technical brief. New York, USA2020.
15. Kroenke K, Spitzer RL, Williams JB, Löwe B. An ultra-brief screening scale for anxiety and depression: the PHQ-4. *Psychosomatics*. 2009;50(6):613-21.
16. Workneh F, Wang D, Millogo O, Worku A, Chukwu A, Lankoande B, et al. Knowledge and practice related to COVID-19 and mental health among adults in sub-Saharan Africa. *The American Journal of Tropical Medicine and Hygiene*. 2021;105(2):351.
17. Luz PM, Torres TS, Almeida-Brasil CC, Marins LMS, Bezerra DRB, Veloso VG, et al. Translation and validation of the Short HIV Stigma scale in Brazilian Portuguese. *Health Qual Life Outcomes*. 2020;18(1):322.
18. Reinius M, Wettergren L, Wiklander M, Svedhem V, Ekström AM, Eriksson LE. Development of a 12-item short version of the HIV stigma scale. *Health and Quality of Life Outcomes*. 2017;15(1):115.
19. Lamontagne E, Howell S, Yakusik A, Bollinger J, Bouvard L, Ross MW. The global internet survey on happiness, health and well-being among sexual and gender minority: design and methods. 2022 (under review).
20. Adler NE, Epel ES, Castellazzo G, Ickovics JR. Relationship of subjective and objective social status with psychological and physiological functioning: Preliminary data in healthy, White women. *Health psychology*. 2000;19(6):586.

21. Santos G-M, Ackerman B, Rao A, Wallach S, Ayala G, Lamontagne E, et al. Economic, Mental Health, HIV Prevention and HIV Treatment Impacts of COVID-19 and the COVID-19 Response on a Global Sample of Cisgender Gay Men and Other Men Who Have Sex with Men. *AIDS and behavior*. 2020;1-11.
22. Rosenthal JA. Qualitative Descriptors of Strength of Association and Effect Size. *Journal of Social Service Research*. 1996;21(4):37-59.
